# Supplementary material for: Highly enantioselective aza-Michael addition reactions of 4-nitrophthalimide with α,β-unsaturated ketones
Source: Royal Society of Chemistry journal article supplement (doi:10.1039/c3ra41179f), 2013-01-01
Supplement: c3ra41179f.pdf [file c3ra41179f.pdf]

## Highly enantioselective aza-Michael addition reactions of 4-nitrophthalimide to $\alpha$ , $\beta$ -unsaturated ketones

Shijun Ma,<sup>a</sup> Lulu Wu,<sup>a</sup> Ming Liu,<sup>b</sup> Xiufang Xu,<sup>a</sup> Yaodong Huang\*<sup>b</sup> and Yongmei Wang\*<sup>a</sup>

<sup>a</sup> *Department of Chemistry, The Key Laboratory of Elemento-Organic Chemistry, Nankai University, Tianjin 300071, China; ymw@nankai.edu.cn*

<sup>b</sup> *Department of Chemical Engineering and Technology, Tianjin University, Tianjin 300072, China.*

## Supporting Information for highly enantioselective aza-Michael addition reactions of 4-nitrophthalimide to $\alpha$ , $\beta$ -unsaturated ketones

Shijun Ma, Lulu Wu, Ming Liu, Xiufang Xu, Yaodong Huang\* and Yongmei Wang\*

**General Information:** All the solvents were purified according to standard procedures. Catalysts **III**, **IV** and **V** were synthesized by literature procedure.<sup>[1]</sup> The <sup>1</sup>H NMR spectra were recorded at 400 MHz and <sup>13</sup>C NMR spectra were recorded at 100 MHz with Bruker AV400 spectrometer. <sup>1</sup>H and <sup>13</sup>C NMR chemical shifts were calibrated to tetramethylsilane as an external reference. Coupling constants are given in hertz. The following abbreviations are used to indicate the multiplicity: s, singlet; d, double; t, triplet; m, multiplet. HR-MS were recorded on an IonSpec FT-ICR mass spectrometer with ESI resource. All melting points were determined on a RY-I apparatus and are uncorrected. Optical rotations were measured with a Perkin-Elmer 341 polarimeter at 25 °C. HPLC analysis was performed on Shimadzu CTO-10AS by using a Chiralpak AD-H column purchased from Daicel Chemical Industries. The chemicals were purchased from commercial suppliers (Aldrich, USA and Shanghai Chemical Company, China), and were used without purification prior to use. All reactions unless otherwise noted were carried out directly under air.

### Experimental Section:

#### General procedure for enantioselective aza-Michael addition of 4-nitrophthalimides **1b** with $\alpha$ , $\beta$ -unsaturated ketones **2**:

2-Cl-PhCOOH (6 mg, 40 mol%) and 4 Å MS (5 mg) were added to a stirred solution of catalyst **V** (7 mg, 20 mol%) in CHCl<sub>3</sub> (1 mL), and the solution was stirred for 5 minutes at room temperature. After addition of  $\alpha$ ,  $\beta$ -unsaturated ketones (0.1 mmol), the mixture was stirred for 10 minutes, then 4-nitrophthalimides (19 mg, 0.1 mmol) was added and stirring was continued for the indicated time. The crude reaction mixture was then loaded onto a silica gel column for purification (EtOAc/petroleum, 1:5) to afford the corresponding Michael adducts **3**.

#### Characterization of adducts **3**:

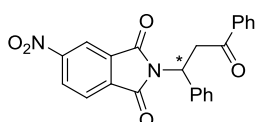

#### 5-nitro-2-(3-oxo-1,3-diphenylpropyl)isoindoline-1,3-dione (**3ba**).

White solid, m.p. 63-65°C, 55% yield,  $[\alpha]_D^{25} = +31.00$  (*c* 0.2, CH<sub>2</sub>Cl<sub>2</sub>). <sup>1</sup>H NMR (400 MHz, CDCl<sub>3</sub>)  $\delta$  8.59 (s, 1H, O<sub>2</sub>N-ArH), 8.55 (d, *J* = 8.1 Hz, 1H, O<sub>2</sub>N-ArH), 7.97 (t, *J* = 7.5 Hz, 3H, ArH), 7.67 – 7.53 (m, 3H, ArH), 7.46 (t, *J* = 7.6 Hz, 2H, ArH), 7.34 (dt, *J* = 23.6, 7.2 Hz, 3H, ArH), 6.07 (dd, *J* = 10.3, 4.6 Hz, 1H, NCH), 4.69 (dd, *J* = 18.3, 10.3 Hz, 1H, CHHCO), 3.76 (dd, *J* = 18.3, 4.6 Hz, 1H, CHHCO). <sup>13</sup>C NMR (100 MHz, CDCl<sub>3</sub>)  $\delta$  196.7, 166.2, 166.0, 151.7, 138.7, 136.3, 136.2, 133.7, 133.3, 129.2, 129.0, 128.8, 128.5, 128.1, 127.9, 124.5, 118.8, 51.3, 39.8. HRMS calcd for C<sub>23</sub>H<sub>16</sub>N<sub>2</sub>O<sub>5</sub>Na, [M+Na]<sup>+</sup> 423.0957, found 423.0950. The *ee* was determined by HPLC using a Chiralpak AD-H column [hexane/*i*-PrOH (80:20)]; flow rate 1.0 mLmin<sup>-1</sup>; major = 30.2 min, minor = 37.3 min (>99% *ee*).

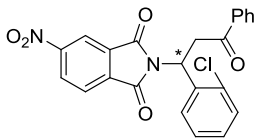

#### 2-(1-(2-chlorophenyl)-3-oxo-3-phenylpropyl)-5-nitroisoindoline-1,3-dione (**3bb**).

White solid, m.p. 73-75°C, 61% yield,  $[\alpha]_D^{25} = +34.46$  (*c* 0.2, CH<sub>2</sub>Cl<sub>2</sub>). <sup>1</sup>H NMR (400 MHz, CDCl<sub>3</sub>)  $\delta$  8.65 (s, 1H, O<sub>2</sub>N-ArH), 8.60 (d, *J* = 8.1 Hz, 1H, O<sub>2</sub>N-ArH), 8.00 (dd, *J* = 26.9, 8.0 Hz, 3H, ArH), 7.73 – 7.54 (m, 2H, ArH), 7.53 – 7.39 (m, 3H, ArH), 7.36 – 7.20 (m, 2H, ArH), 6.48 (dd, *J* = 10.5, 4.3 Hz, 1H, NCH), 4.57 (dd, *J* = 18.1, 10.6 Hz, 1H, CHHCO), 3.74 (dd, *J* = 18.1, 4.3 Hz, 1H, CHHCO). <sup>13</sup>C NMR (100 MHz, CDCl<sub>3</sub>)  $\delta$  196.5, 166.3, 166.1, 151.8, 136.2, 136.0, 133.7, 133.16, 133.0, 130.1, 129.5, 129.3, 128.9, 128.8, 128.1, 127.3, 124.7, 118.9, 48.8, 39.5. HRMS calcd for C<sub>23</sub>H<sub>15</sub>ClN<sub>2</sub>O<sub>5</sub>Na, [M+Na]<sup>+</sup> 457.0567, found 457.0557. The *ee* was determined by HPLC using a Chiralpak AD-H

column [hexane/*i*-PrOH (80:20)]; flow rate 1.0 mLmin<sup>-1</sup>; major = 26.6 min, minor = 28.6 min (95% *ee*).

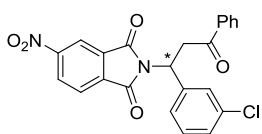

**2-(1-(3-chlorophenyl)-3-oxo-3-phenylpropyl)-5-nitroisoindoline-1,3-dione (3bc).**

White solid, m.p. 66-68°C, 65% yield,  $[\alpha]_D^{25} = +30.33$  (*c* 0.2, CH<sub>2</sub>Cl<sub>2</sub>). <sup>1</sup>H NMR (400 MHz, CDCl<sub>3</sub>) δ 8.64 (d, *J* = 1.7 Hz, 1H, O<sub>2</sub>N-ArH), 8.59 (dd, *J* = 8.1, 1.9 Hz, 1H, O<sub>2</sub>N-ArH), 8.01 (dd, *J* = 16.4, 7.8 Hz, 3H, ArH), 7.66 – 7.57 (m, 2H, ArH), 7.49 (dd, *J* = 9.6, 5.9 Hz, 3H, ArH), 7.36 – 7.27 (m, 2H, ArH), 6.06 (dd, *J* = 10.0, 4.8 Hz, 1H, NCH), 4.66 (dd, *J* = 18.3, 10.1 Hz, 1H, CHHCO), 3.79 (dd, *J* = 18.3, 4.8 Hz, 1H, CHHCO). <sup>13</sup>C NMR (100 MHz, CDCl<sub>3</sub>) δ 196.3, 166.1, 165.9, 151.8, 140.5, 136.1, 136.0, 134.8, 133.8, 133.1, 130.3, 129.3, 128.8, 128.7, 128.1, 126.1, 124.7, 118.9, 50.7, 39.6. HRMS calcd for C<sub>23</sub>H<sub>15</sub>ClN<sub>2</sub>O<sub>5</sub>Na, [M+Na]<sup>+</sup> 457.0567, found 457.0565. The *ee* was determined by HPLC using a Chiralpak AD-H column [hexane/*i*-PrOH (80:20)]; flow rate 1.0 mLmin<sup>-1</sup>; major = 28.6 min, minor = 32.1 min (98% *ee*).

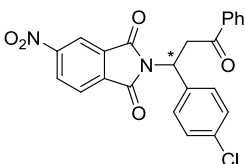

**2-(1-(4-chlorophenyl)-3-oxo-3-phenylpropyl)-5-nitroisoindoline-1,3-dione (3bd).**

White solid, m.p. 73-75°C, 56% yield,  $[\alpha]_D^{25} = +25.98$  (*c* 0.2, CH<sub>2</sub>Cl<sub>2</sub>). <sup>1</sup>H NMR (400 MHz, CDCl<sub>3</sub>) δ 8.63 (s, 1H, O<sub>2</sub>N-ArH), 8.58 (d, *J* = 8.1 Hz, 1H, O<sub>2</sub>N-ArH), 8.00 (dd, *J* = 13.9, 8.0 Hz, 3H, ArH), 7.59 (dd, *J* = 17.1, 7.8 Hz, 3H, ArH), 7.49 (t, *J* = 7.5 Hz, 2H, ArH), 7.36 (d, *J* = 8.2 Hz, 2H, ArH), 6.07 (dd, *J* = 9.7, 4.9 Hz, 1H, NCH), 4.62 (dd, *J* = 18.2, 9.9 Hz, 1H, CHHCO), 3.81 (dd, *J* = 18.2, 4.9 Hz, 1H, CHHCO). <sup>13</sup>C NMR (100 MHz, ) δ 196.3, 166.1, 165.9, 151.8, 137.1, 136.1, 136.1, 134.4, 133.8, 133.2, 129.4, 129.3, 129.2, 128.8, 128.1, 124.6, 118.8, 50.6, 39.7. HRMS calcd for C<sub>23</sub>H<sub>15</sub>ClN<sub>2</sub>O<sub>5</sub>Na, [M+Na]<sup>+</sup> 457.0567, found 457.0567. The *ee* was determined by HPLC using a Chiralpak AD-H column [hexane/*i*-PrOH (80:20)]; flow rate 1.0 mLmin<sup>-1</sup>; major = 36.9 min, minor = 63.3 min (99% *ee*).

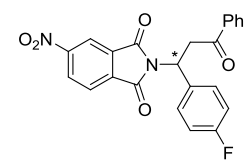

**2-(1-(4-fluorophenyl)-3-oxo-3-phenylpropyl)-5-nitroisoindoline-1,3-dione (3be).**

White solid, m.p. 66-68°C, 60% yield,  $[\alpha]_D^{25} = +38.00$  (*c* 0.2, CH<sub>2</sub>Cl<sub>2</sub>). <sup>1</sup>H NMR (400 MHz, CDCl<sub>3</sub>) δ 8.63 (d, *J* = 1.6 Hz, 1H, O<sub>2</sub>N-ArH), 8.58 (dd, *J* = 8.1, 1.9 Hz, 1H, O<sub>2</sub>N-ArH), 8.00 (dd, *J* = 12.3, 7.8 Hz, 3H, ArH), 7.62 (dt, *J* = 13.9, 6.8 Hz, 3H, ArH), 7.49 (t, *J* = 7.7 Hz, 2H, ArH), 7.08 (t, *J* = 8.6 Hz, 2H, ArH), 6.08 (dd, *J* = 9.9, 4.9 Hz, 1H, NCH), 4.64 (dd, *J* = 18.2, 10.0 Hz, 1H, CHHCO), 3.79 (dt, *J* = 19.9, 9.9 Hz, 1H, CHHCO). <sup>13</sup>C NMR (100 MHz, CDCl<sub>3</sub>) δ 196.4, 166.1, 165.9, 151.8, 136.2, 136.1, 134.5, 133.7, 133.2, 129.9, 129.8, 129.3, 128.8, 128.1, 124.6, 118.8, 116.0, 115.8, 50.5, 39.8. HRMS calcd for C<sub>23</sub>H<sub>15</sub>FN<sub>2</sub>O<sub>5</sub>Na, [M+Na]<sup>+</sup> 441.0863, found 441.0860. The *ee* was determined by HPLC using a Chiralpak AD-H column [hexane/*i*-PrOH (80:20)]; flow rate 1.0 mLmin<sup>-1</sup>; major = 34.4 min, minor = 54.0 min (>99% *ee*).

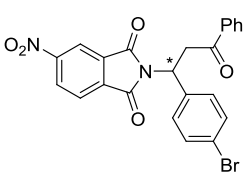

**2-(1-(4-bromophenyl)-3-oxo-3-phenylpropyl)-5-nitroisoindoline-1,3-dione (3bf).**

White solid, m.p. 70-72°C, 62% yield,  $[\alpha]_D^{25} = +23.44$  (*c* 0.2, CH<sub>2</sub>Cl<sub>2</sub>). <sup>1</sup>H NMR (400 MHz, CDCl<sub>3</sub>) δ 8.62 (s, 1H, O<sub>2</sub>N-ArH), 8.58 (dd, *J* = 8.1, 1.6 Hz, 1H, O<sub>2</sub>N-ArH), 8.00 (dd, *J* = 14.2, 7.9 Hz, 3H, ArH), 7.61 (t, *J* = 7.3 Hz, 1H, ArH), 7.55 – 7.44 (m, 6H, ArH), 6.06 (dd, *J* = 9.8, 5.0 Hz, 1H, NCH), 4.61 (dd, *J* = 18.2, 9.8 Hz, 1H, CHHCO), 3.81 (dd, *J* = 18.2, 5.0 Hz, 1H, CHHCO). <sup>13</sup>C NMR (100 MHz, CDCl<sub>3</sub>) δ 196.3, 166.1, 165.9, 151.8, 137.6, 136.1, 136.1, 133.8, 133.1, 132.1, 129.7, 129.3, 128.8, 128.1, 124.6, 122.6, 118.8, 50.6, 39.6. HRMS calcd for C<sub>23</sub>H<sub>15</sub>BrN<sub>2</sub>O<sub>5</sub>Na, [M+Na]<sup>+</sup> 501.0062, found 501.0053. The *ee* was determined by HPLC using a Chiralpak AD-H column [hexane/*i*-PrOH (80:20)]; flow rate 1.0 mLmin<sup>-1</sup>; major = 40.6 min, minor = 68.7 min (99% *ee*).

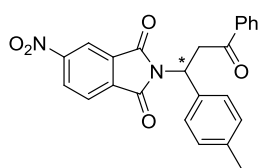

**5-nitro-2-(3-oxo-3-phenyl-1-p-tolylpropyl)isoindoline-1,3-dione (3bg).**

White solid, m.p. 71-73°C, 69% yield,  $[\alpha]_D^{25} = +28.81$  (*c* 0.2, CH<sub>2</sub>Cl<sub>2</sub>). <sup>1</sup>H NMR (400 MHz, CDCl<sub>3</sub>) δ 8.59 (s, 1H, O<sub>2</sub>N-ArH), 8.54 (d, *J* = 8.2 Hz, 1H, O<sub>2</sub>N-ArH), 7.97 (dd, *J* = 8.0, 3.9 Hz, 3H, ArH), 7.57 (t, *J* = 7.0 Hz, 1H, ArH), 7.53 – 7.41 (m, 4H, ArH), 7.18 (d, *J* = 7.8 Hz, 2H, ArH), 6.04 (dd, *J* = 10.2, 4.6 Hz, 1H, NCH), 4.67 (dd, *J* = 18.2, 10.3 Hz, 1H, CHHCO),

3.75 (dd,  $J = 18.2, 4.6$  Hz, 1H, CHHCO), 2.33 (s, 3H, CH<sub>3</sub>). <sup>13</sup>C NMR (100 MHz, CDCl<sub>3</sub>) δ 196.7, 166.2, 166.0, 151.7, 138.4, 136.3, 136.2, 135.7, 133.6, 133.3, 129.6, 129.2, 128.8, 128.1, 127.8, 124.5, 118.7, 51.0, 39.8, 21.1. HRMS calcd for C<sub>24</sub>H<sub>18</sub>N<sub>2</sub>O<sub>5</sub>Na, [M+Na]<sup>+</sup> 437.1113, found 437.1104. The *ee* was determined by HPLC using a Chiralpak AD-H column [hexane/*i*-PrOH (80:20)]; flow rate 1.0 mLmin<sup>-1</sup>; major = 32.3 min, minor = 48.5 min (99% *ee*).

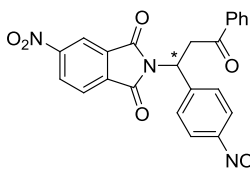

**5-nitro-2-(1-(4-nitrophenyl)-3-oxo-3-phenylpropyl)isoindoline-1,3-dione (3bh).**

White solid, m.p. 93-95°C, 49% yield,  $[\alpha]_D^{25} = +13.96$  (*c* 0.2, CH<sub>2</sub>Cl<sub>2</sub>). <sup>1</sup>H NMR (400 MHz, CDCl<sub>3</sub>) δ 8.65 (s, 1H, ArH), 8.64 – 8.57 (m, 1H, ArH), 8.25 (d,  $J = 8.7$  Hz, 2H, ArH), 8.02 (dd,  $J = 25.8, 8.0$  Hz, 3H, ArH), 7.81 (d,  $J = 8.6$  Hz, 2H, ArH), 7.62 (t,  $J = 7.4$  Hz, 1H, ArH), 7.50 (t,  $J = 7.7$  Hz, 2H, ArH), 6.20 (dd,  $J = 9.2, 5.5$  Hz, 1H, NCH), 4.58 (dd,  $J = 18.2, 9.3$  Hz, 1H, CHHCO), 3.93 (dd,  $J = 18.2, 5.5$  Hz, 1H, CHHCO). <sup>13</sup>C NMR (100 MHz, CDCl<sub>3</sub>) δ 195.8, 166.0, 165.8, 151.9, 147.8, 145.4, 135.9, 135.8, 134.0, 133.0, 129.5, 129.0, 128.9, 128.1, 124.8, 124.2, 119.0, 50.5, 39.5. HRMS calcd for C<sub>23</sub>H<sub>15</sub>N<sub>3</sub>O<sub>7</sub>Na, [M+Na]<sup>+</sup> 468.0808, found 468.0800. The *ee* was determined by HPLC using a Chiralpak AD-H column [hexane/*i*-PrOH (70:30)]; flow rate 1.0 mLmin<sup>-1</sup>; major = 70.6 min, minor = 84.4 min (>99% *ee*).

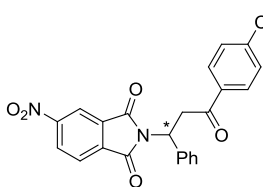

**2-(3-(4-chlorophenyl)-3-oxo-1-phenylpropyl)-5-nitroisoindoline-1,3-dione (3bi).**

White solid, m.p. 178-179°C, 54% yield,  $[\alpha]_D^{25} = +41.49$  (*c* 0.2, CH<sub>2</sub>Cl<sub>2</sub>). <sup>1</sup>H NMR (400 MHz, CDCl<sub>3</sub>) δ 8.60 (s, 1H, O<sub>2</sub>N-ArH), 8.56 (d,  $J = 8.1$  Hz, 1H, O<sub>2</sub>N-ArH), 7.99 (d,  $J = 8.1$  Hz, 1H, ArH), 7.91 (d,  $J = 8.4$  Hz, 2H, ArH), 7.59 (d,  $J = 7.4$  Hz, 2H, ArH), 7.43 (d,  $J = 8.4$  Hz, 2H, ArH), 7.35 (dt,  $J = 22.3, 7.1$  Hz, 3H, ArH), 6.05 (dd,  $J = 10.2, 4.5$  Hz, 1H, NCH), 4.66 (dd,  $J = 18.3, 10.3$  Hz, 1H, CHHCO), 3.72 (dd,  $J = 18.2, 4.6$  Hz, 1H, CHHCO). <sup>13</sup>C NMR (100 MHz, CDCl<sub>3</sub>) δ 195.5, 166.2, 166.0, 151.7, 140.2, 138.5, 136.2, 134.5, 133.2, 129.5, 129.3, 129.1, 129.0, 128.6, 127.8, 124.6, 118.8, 51.2, 39.8. HRMS calcd for C<sub>23</sub>H<sub>15</sub>ClN<sub>2</sub>O<sub>5</sub>Na, [M+Na]<sup>+</sup> 457.0567, found 457.0563. The *ee* was determined by HPLC using a Chiralpak AD-H column [hexane/*i*-PrOH (80:20)]; flow rate 1.0 mLmin<sup>-1</sup>; major = 59.2 min, minor = 63.5 min (99% *ee*).

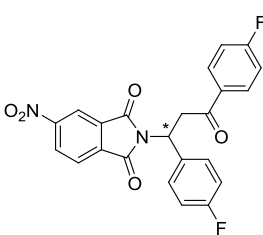

**2-(1,3-bis(4-fluorophenyl)-3-oxopropyl)-5-nitroisoindoline-1,3-dione (3bj).**

White solid, m.p. 70-71°C, 71% yield,  $[\alpha]_D^{25} = +16.52$  (*c* 0.2, CH<sub>2</sub>Cl<sub>2</sub>). <sup>1</sup>H NMR (400 MHz, CDCl<sub>3</sub>) δ 8.63 (s, 1H, O<sub>2</sub>N-ArH), 8.59 (dd,  $J = 8.1, 1.7$  Hz, 1H, O<sub>2</sub>N-ArH), 8.02 (dd,  $J = 8.2, 3.8$  Hz, 3H, ArH), 7.62 (dd,  $J = 8.5, 5.3$  Hz, 2H, ArH), 7.16 (t,  $J = 8.5$  Hz, 2H, ArH), 7.08 (t,  $J = 8.6$  Hz, 2H, ArH), 6.07 (dd,  $J = 9.9, 4.9$  Hz, 1H, NCH), 4.63 (dd,  $J = 18.2, 10.0$  Hz, 1H, CHHCO), 3.77 (dd,  $J = 18.2, 5.0$  Hz, 1H, CHHCO). <sup>13</sup>C NMR (100 MHz, CDCl<sub>3</sub>) δ 194.8, 166.1, 165.9, 151.8, 136.1, 134.5, 134.4, 133.2, 132.6, 130.9, 130.8, 129.9, 129.8, 129.3, 124.63, 118.8, 116.1, 116.0, 115.9, 115.8, 50.5, 39.8. HRMS calcd for C<sub>23</sub>H<sub>14</sub>F<sub>2</sub>N<sub>2</sub>O<sub>5</sub>Na, [M+Na]<sup>+</sup> 459.0768, found 459.0760. The *ee* was determined by HPLC using a Chiralpak AD-H column [hexane/*i*-PrOH (80:20)]; flow rate 1.0 mLmin<sup>-1</sup>; major = 45.7 min, minor = 76.3 min (99% *ee*).

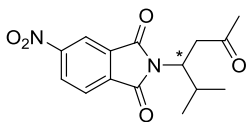

**2-(2-methyl-5-oxohexan-3-yl)-5-nitroisoindoline-1,3-dione (3bk).**

Colorless oil; 75% yield,  $[\alpha]_D^{25} = +33.05$  (*c* 0.2, CH<sub>2</sub>Cl<sub>2</sub>). <sup>1</sup>H NMR (400 MHz, CDCl<sub>3</sub>) δ 8.64 (d,  $J = 1.6$  Hz, 1H, ArH), 8.60 (dd,  $J = 8.1, 1.9$  Hz, 1H, ArH), 8.03 (d,  $J = 8.1$  Hz, 1H, ArH), 4.45 – 4.35 (m, 1H, NCH), 3.58 – 3.45 (m, 1H, CHHCO), 2.94 (dd,  $J = 17.9, 3.9$  Hz, 1H, CHHCO), 2.35 – 2.22 (m, 1H, CH<sub>3</sub>CHCH<sub>3</sub>), 2.14 (s, 3H, COCH<sub>3</sub>), 1.04 (d,  $J = 6.7$  Hz, 3H, CH<sub>3</sub>CHCH<sub>3</sub>), 0.90 (t,  $J = 7.5$  Hz, 3H, CH<sub>3</sub>CHCH<sub>3</sub>). <sup>13</sup>C NMR (100 MHz, CDCl<sub>3</sub>) δ 206.2, 166.5, 166.2, 151.7, 136.1, 133.1, 129.2, 124.5, 118.7, 53.7, 42.5, 30.7, 30.2, 19.9, 19.6. HRMS calcd for C<sub>15</sub>H<sub>16</sub>N<sub>2</sub>O<sub>5</sub>Na, [M+Na]<sup>+</sup> 327.0957, found 327.0954. The *ee* was determined by HPLC using a Chiralpak AD-H column [hexane/*i*-PrOH (80:20)]; flow rate 1.0 mLmin<sup>-1</sup>; minor = 9.1 min, major = 9.6 min (97% *ee*).

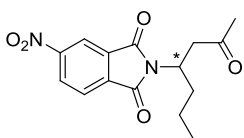

**5-nitro-2-(2-oxoheptan-4-yl)isoindoline-1,3-dione (3bl).** Colorless oil; 88% yield,  $[\alpha]_{\text{D}}^{25} = +18.89$  (*c* 0.2,  $\text{CH}_2\text{Cl}_2$ ).  $^1\text{H NMR}$  (400 MHz,  $\text{CDCl}_3$ )  $\delta$  8.65 (d,  $J = 1.5$  Hz, 1H, ArH), 8.61 (dd,  $J = 8.1, 1.9$  Hz, 1H, ArH), 8.03 (d,  $J = 8.1$  Hz, 1H, ArH), 4.82 – 4.69 (m, 1H, NCH), 3.39 (dd,  $J = 17.9, 9.3$  Hz, 1H, CHHCO), 2.97 (dd,  $J = 17.9, 5.2$  Hz, 1H, CHHCO), 2.16 (s, 3H,  $\text{COCH}_3$ ), 2.08 – 1.94 (m, 1H, NCHCHHCH<sub>2</sub>), 1.75 – 1.61 (m, 1H, NCHCHHCH<sub>2</sub>), 1.40 – 1.21 (m, 2H,  $\text{CH}_2\text{CH}_3$ ), 0.93 (q,  $J = 7.7$  Hz, 3H,  $\text{CH}_2\text{CH}_3$ ).  $^{13}\text{C NMR}$  (100 MHz,  $\text{CDCl}_3$ )  $\delta$  205.8, 166.3, 166.1, 151.7, 136.2, 133.2, 129.2, 124.4, 118.7, 47.5, 45.2, 34.5, 30.2, 19.5, 13.6. HRMS calcd for  $\text{C}_{15}\text{H}_{16}\text{N}_2\text{O}_5\text{Na}$ ,  $[\text{M}+\text{Na}]^+$  327.0957, found 327.0948. The *ee* was determined by HPLC using a Chiralpak AD-H column [hexane/*i*-PrOH (80:20)]; flow rate 1.0  $\text{mLmin}^{-1}$ ; minor = 9.7 min, major = 10.4 min (96% *ee*).

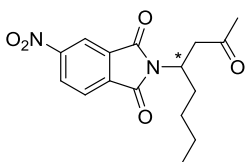

**5-nitro-2-(2-oxooctan-4-yl)isoindoline-1,3-dione (3bm).** Colorless oil, 89% yield,  $[\alpha]_{\text{D}}^{25} = +22.69$  (*c* 0.2,  $\text{CH}_2\text{Cl}_2$ ).  $^1\text{H NMR}$  (400 MHz,  $\text{CDCl}_3$ )  $\delta$  8.63 (d,  $J = 1.5$  Hz, 1H, ArH), 8.59 (dd,  $J = 8.1, 2.0$  Hz, 1H, ArH), 8.02 (d,  $J = 8.2$  Hz, 1H, ArH), 4.78 – 4.64 (m, 1H, NCH), 3.37 (dd,  $J = 17.9, 9.3$  Hz, 1H, CHHCO), 2.96 (dd,  $J = 17.9, 5.2$  Hz, 1H, CHHCO), 2.14 (s, 3H,  $\text{COCH}_3$ ), 2.05 – 1.90 (m, 1H, NCHCHHCH<sub>2</sub>), 1.79 – 1.60 (m, 1H, NCHCHHCH<sub>2</sub>), 1.43 – 1.12 (m, 4H,  $\text{C}_2\text{H}_4\text{CH}_3$ ), 0.86 (t,  $J = 7.1$  Hz, 3H,  $\text{C}_2\text{H}_4\text{CH}_3$ ).  $^{13}\text{C NMR}$  (100 MHz,  $\text{CDCl}_3$ )  $\delta$  205.8, 166.3, 166.1, 151.7, 136.2, 133.2, 129.2, 124.5, 118.7, 47.7, 45.2, 32.2, 30.2, 28.4, 22.2, 13.9. HRMS calcd for  $\text{C}_{16}\text{H}_{18}\text{N}_2\text{O}_5\text{Na}$ ,  $[\text{M}+\text{Na}]^+$  341.1113, found 341.1107. The *ee* was determined by HPLC using a Chiralpak AD-H column [hexane/*i*-PrOH (80:20)]; flow rate 1.0  $\text{mLmin}^{-1}$ ; minor = 9.1 min, major = 9.6 min (95% *ee*).

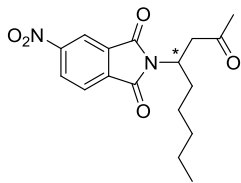

**5-nitro-2-(2-oxononan-4-yl)isoindoline-1,3-dione (3bn).** Colorless oil, 98% yield,  $[\alpha]_{\text{D}}^{25} = +24.04$  (*c* 0.2,  $\text{CH}_2\text{Cl}_2$ ).  $^1\text{H NMR}$  (400 MHz,  $\text{CDCl}_3$ )  $\delta$  8.63 (d,  $J = 1.4$  Hz, 1H, ArH), 8.59 (dd,  $J = 8.1, 1.8$  Hz, 1H, ArH), 8.02 (d,  $J = 8.1$  Hz, 1H, ArH), 4.85 – 4.57 (m, 1H, NCH), 3.53 – 3.25 (m, 1H, CHHCO), 2.95 (dd,  $J = 17.9, 5.2$  Hz, 1H, CHHCO), 2.14 (s, 3H,  $\text{COCH}_3$ ), 2.03 – 1.90 (m, 1H, NCHCHHCH<sub>2</sub>), 1.70 (tt,  $J = 10.4, 5.1$  Hz, 1H, NCHCHHCH<sub>2</sub>), 1.29 (dd,  $J = 22.9, 4.0$  Hz, 6H,  $\text{C}_3\text{H}_6\text{CH}_3$ ), 0.84 (t,  $J = 6.7$  Hz, 3H,  $\text{C}_3\text{H}_6\text{CH}_3$ ).  $^{13}\text{C NMR}$  (101 MHz,  $\text{CDCl}_3$ )  $\delta$  205.8, 166.3, 166.0, 151.7, 136.2, 133.2, 129.2, 124.5, 118.7, 47.7, 45.2, 32.4, 31.2, 30.2, 25.9, 22.4, 14.0. HRMS calcd for  $\text{C}_{17}\text{H}_{20}\text{N}_2\text{O}_5\text{Na}$ ,  $[\text{M}+\text{Na}]^+$  355.1270, found 355.1269. The *ee* was determined by HPLC using a Chiralpak AD-H column [hexane/*i*-PrOH (80:20)]; flow rate 1.0  $\text{mLmin}^{-1}$ ; minor = 8.9 min, major = 9.3 min (95% *ee*).

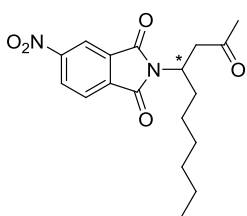

**5-nitro-2-(2-oxodecan-4-yl)isoindoline-1,3-dione (3bo).** Colorless oil, 90% yield,  $[\alpha]_{\text{D}}^{25} = +26.72$  (*c* 0.2,  $\text{CH}_2\text{Cl}_2$ ).  $^1\text{H NMR}$  (400 MHz,  $\text{CDCl}_3$ )  $\delta$  8.63 (d,  $J = 1.5$  Hz, 1H, ArH), 8.59 (dd,  $J = 8.1, 2.0$  Hz, 1H, ArH), 8.02 (d,  $J = 8.0$  Hz, 1H, ArH), 4.77 – 4.66 (m, 1H, NCH), 3.37 (dd,  $J = 17.9, 9.3$  Hz, 1H, CHHCO), 2.95 (dd,  $J = 17.9, 5.2$  Hz, 1H, CHHCO), 2.14 (s, 3H,  $\text{COCH}_3$ ), 2.04 – 1.92 (m, 1H, NCHCHHCH<sub>2</sub>), 1.70 (ddd,  $J = 17.7, 9.7, 4.6$  Hz, 1H, NCHCHHCH<sub>2</sub>), 1.36 – 1.14 (m, 8H,  $\text{C}_4\text{H}_8\text{CH}_3$ ), 0.84 (t,  $J = 6.9$  Hz, 3H,  $\text{C}_4\text{H}_8\text{CH}_3$ ).  $^{13}\text{C NMR}$  (101 MHz,  $\text{CDCl}_3$ )  $\delta$  205.8, 166.3, 166.1, 151.7, 136.2, 133.2, 129.2, 124.5, 118.7, 47.8, 45.2, 32.5, 31.6, 30.2, 28.8, 26.2, 22.5, 14.0. HRMS calcd for  $\text{C}_{18}\text{H}_{22}\text{N}_2\text{O}_5\text{Na}$ ,  $[\text{M}+\text{Na}]^+$  369.1426, found 369.1415. The *ee* was determined by HPLC using a Chiralpak AD-H column [hexane/*i*-PrOH (80:20)]; flow rate 1.0  $\text{mLmin}^{-1}$ ; minor = 8.7 min, major = 9.3 min (96% *ee*).

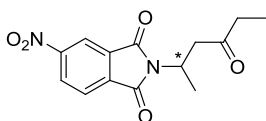

**5-nitro-2-(4-oxohexan-2-yl)isoindoline-1,3-dione (3bp).** Colorless oil, 51% yield,  $[\alpha]_{\text{D}}^{25} = +21.39$  (*c* 0.2,  $\text{CH}_2\text{Cl}_2$ ).  $^1\text{H NMR}$  (400 MHz,  $\text{CDCl}_3$ )  $\delta$  8.65 (d,  $J = 1.5$  Hz, 1H, ArH), 8.60 (dd,  $J = 8.1, 1.9$  Hz, 1H, ArH), 8.03 (d,  $J = 8.1$  Hz, 1H, ArH), 4.88 (tt,  $J = 13.8, 6.9$  Hz, 1H, NCH), 3.37 (dd,  $J = 17.8, 8.9$  Hz, 1H, CHHCO), 2.96 (dd,  $J = 17.8, 5.7$  Hz, 1H, CHHCO), 2.53 – 2.37 (m, 2H,  $\text{CH}_2\text{CH}_3$ ), 1.49 (d,  $J = 7.0$  Hz, 3H, NCHCH<sub>3</sub>), 1.07 – 0.98 (t,  $J = 7.3$  Hz, 3H,  $\text{CH}_2\text{CH}_3$ ).  $^{13}\text{C NMR}$  (101 MHz,  $\text{CDCl}_3$ )  $\delta$  208.4, 166.1, 165.8, 151.7, 136.4, 133.4, 129.2, 124.4, 118.6, 44.9, 43.3, 36.1,

18.9, 7.6. HRMS calcd for  $C_{14}H_{14}N_2O_5Na$ ,  $[M+Na]^+$  313.0800, found 313.0799. The *ee* was determined by HPLC using a Chiralpak AD-H column [hexane/*i*-PrOH (80:20)]; flow rate 1.0 mLmin<sup>-1</sup>; minor = 12.7 min, major = 14.5 min (95% *ee*).

#### Crystallographic Structure Determination:

**Recrystallization of 3bc:** 2-(1-(3-chlorophenyl)-3-oxo-3-phenylpropyl)-5-nitroisindoline-1,3-dione (**3bc**) was recrystallized from CH<sub>2</sub>Cl<sub>2</sub>/hexane solvent system at room temperature.

Data of X-ray diffraction were collected at 113 K on a Rigaku 007 Saturn 70 CCD diffractometer.

Crystal data and structure refinement for **3bc**.

|                                   |                                                                                                                      |
|-----------------------------------|----------------------------------------------------------------------------------------------------------------------|
| Identification code               | shelx                                                                                                                |
| Empirical formula                 | C <sub>23</sub> H <sub>15</sub> Cl N <sub>2</sub> O <sub>5</sub>                                                     |
| Formula weight                    | 434.82                                                                                                               |
| Temperature                       | 113(2) K                                                                                                             |
| Wavelength                        | 0.71073 Å                                                                                                            |
| Crystal system, space group       | Monoclinic, P2(1)                                                                                                    |
| Unit cell dimensions              | a = 5.9139(18) Å    alpha = 90 deg.<br>b = 18.664(6) Å    beta = 93.314(5) deg.<br>c = 8.834(3) Å    gamma = 90 deg. |
| Volume                            | 973.4(5) Å <sup>3</sup>                                                                                              |
| Z, Calculated density             | 2, 1.483 Mg/m <sup>3</sup>                                                                                           |
| Absorption coefficient            | 0.237 mm <sup>-1</sup>                                                                                               |
| F(000)                            | 448                                                                                                                  |
| Crystal size                      | 0.20 x 0.18 x 0.12 mm                                                                                                |
| Theta range for data collection   | 2.18 to 27.85 deg.                                                                                                   |
| Limiting indices                  | -7<=h<=7, -22<=k<=24, -11<=l<=11                                                                                     |
| Reflections collected / unique    | 11137 / 4549 [R(int) = 0.0391]                                                                                       |
| Completeness to theta = 27.85     | 100.0 %                                                                                                              |
| Absorption correction             | Semi-empirical from equivalents                                                                                      |
| Max. and min. transmission        | 0.9721 and 0.9541                                                                                                    |
| Refinement method                 | Full-matrix least-squares on F <sup>2</sup>                                                                          |
| Data / restraints / parameters    | 4549 / 1 / 280                                                                                                       |
| Goodness-of-fit on F <sup>2</sup> | 1.017                                                                                                                |
| Final R indices [I>2sigma(I)]     | R1 = 0.0309, wR2 = 0.0531                                                                                            |
| R indices (all data)              | R1 = 0.0434, wR2 = 0.0555                                                                                            |
| Absolute structure parameter      | -0.06(4)                                                                                                             |
| Largest diff. peak and hole       | 0.214 and -0.225 e.Å <sup>-3</sup>                                                                                   |

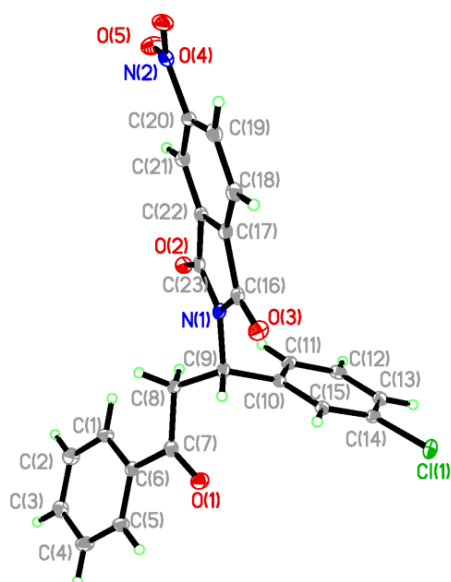

Fig. 1 Molecular structure of **3bc**

#### Calculation section:

Experimentally, we tried four nucleophiles (**1a** through **1d**) for the reaction as shown in Scheme 1, and the result showed that only **1b** took place nucleophilic addition with **2a** and no products were observed when the rest three nucleophiles **1a**, **1c** and **1d** were used. In order to explore the reason for this result, we performed computational study on the structures and the charge distributions of **1a**, **1b**, **1c** and **1d**. All geometry optimization, frequency and Merz–Kollman atomic charge<sup>[2]</sup> calculations were performed with B3LYP/6-31G(d) method in Gaussian 09.<sup>[3]</sup>

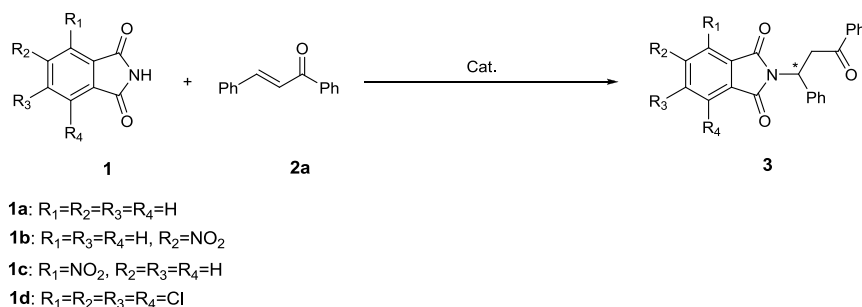

Scheme 1. Model reaction of nucleophilic addition between **1** and **2a**.

Our calculation results (Fig 2 and Table 1) showed that the N1 atom in **1b** has the most negative charge -0.633, compared with the N1 atoms in the rest three species. Moreover, the H2 atom in **1b** has the most positive charge 0.386, compared with the H2 atoms in the rest three species, which means the H2 atom in **1b** may be activated more easily. In addition, the N1-H2 bond length in **1b** is 0.00006 nm longer than that in **1a** and is the longest one among those of the four species. Therefore, it is easier for **1b** to take place nucleophilic addition than the rest three species.

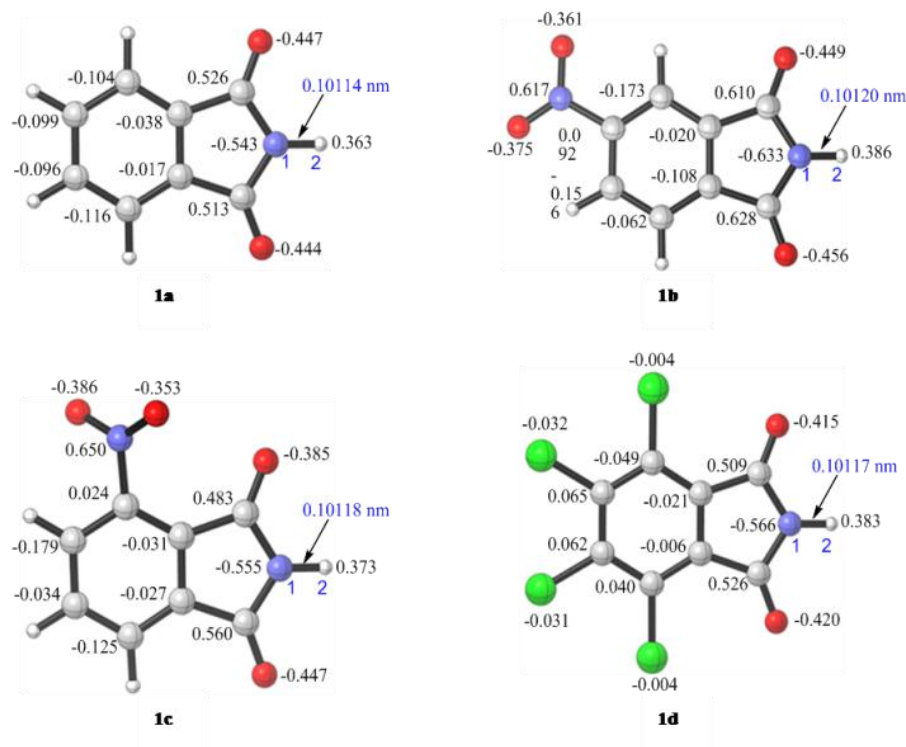

**Fig 2.** B3LYP/6-31G(d) calculated Merz–Kollman atomic charge and bond length in four species, **1a** through **1d**.

**Table 1.** B3LYP/6-31G(d) calculated Merz–Kollman atomic charge and bond length in four species, **1a** through **1d**

| species   | Bond length of N1–H2 (nm) | Merz–Kollman atomic charge |       |
|-----------|---------------------------|----------------------------|-------|
|           |                           | N1                         | H2    |
| <b>1a</b> | 0.10114                   | -0.543                     | 0.363 |
| <b>1b</b> | 0.10120                   | -0.633                     | 0.386 |
| <b>1c</b> | 0.10118                   | -0.555                     | 0.373 |
| <b>1d</b> | 0.10117                   | -0.566                     | 0.383 |

References:

- [1] a) A. Berkessel, B. Seelig, *Synthesis* **2009**, 2113 – 2115; b) B. Vakulya, S. Varga, A. Csámpai, T. Soós, *Org. Lett.* **2005**, 1967–1969.
- [2] Singh, U. C. and Kollman, P. A. *J. Comp. Chem.*, **5** (1984) 129–45.
- [3] Frisch, M. J.; et al. *Gaussian 09*, revision B.01; Gaussian, Inc.: Wallingford, CT, 2010.



**<sup>1</sup>H and <sup>13</sup>C NMR spectrum of Michael adducts 3:**

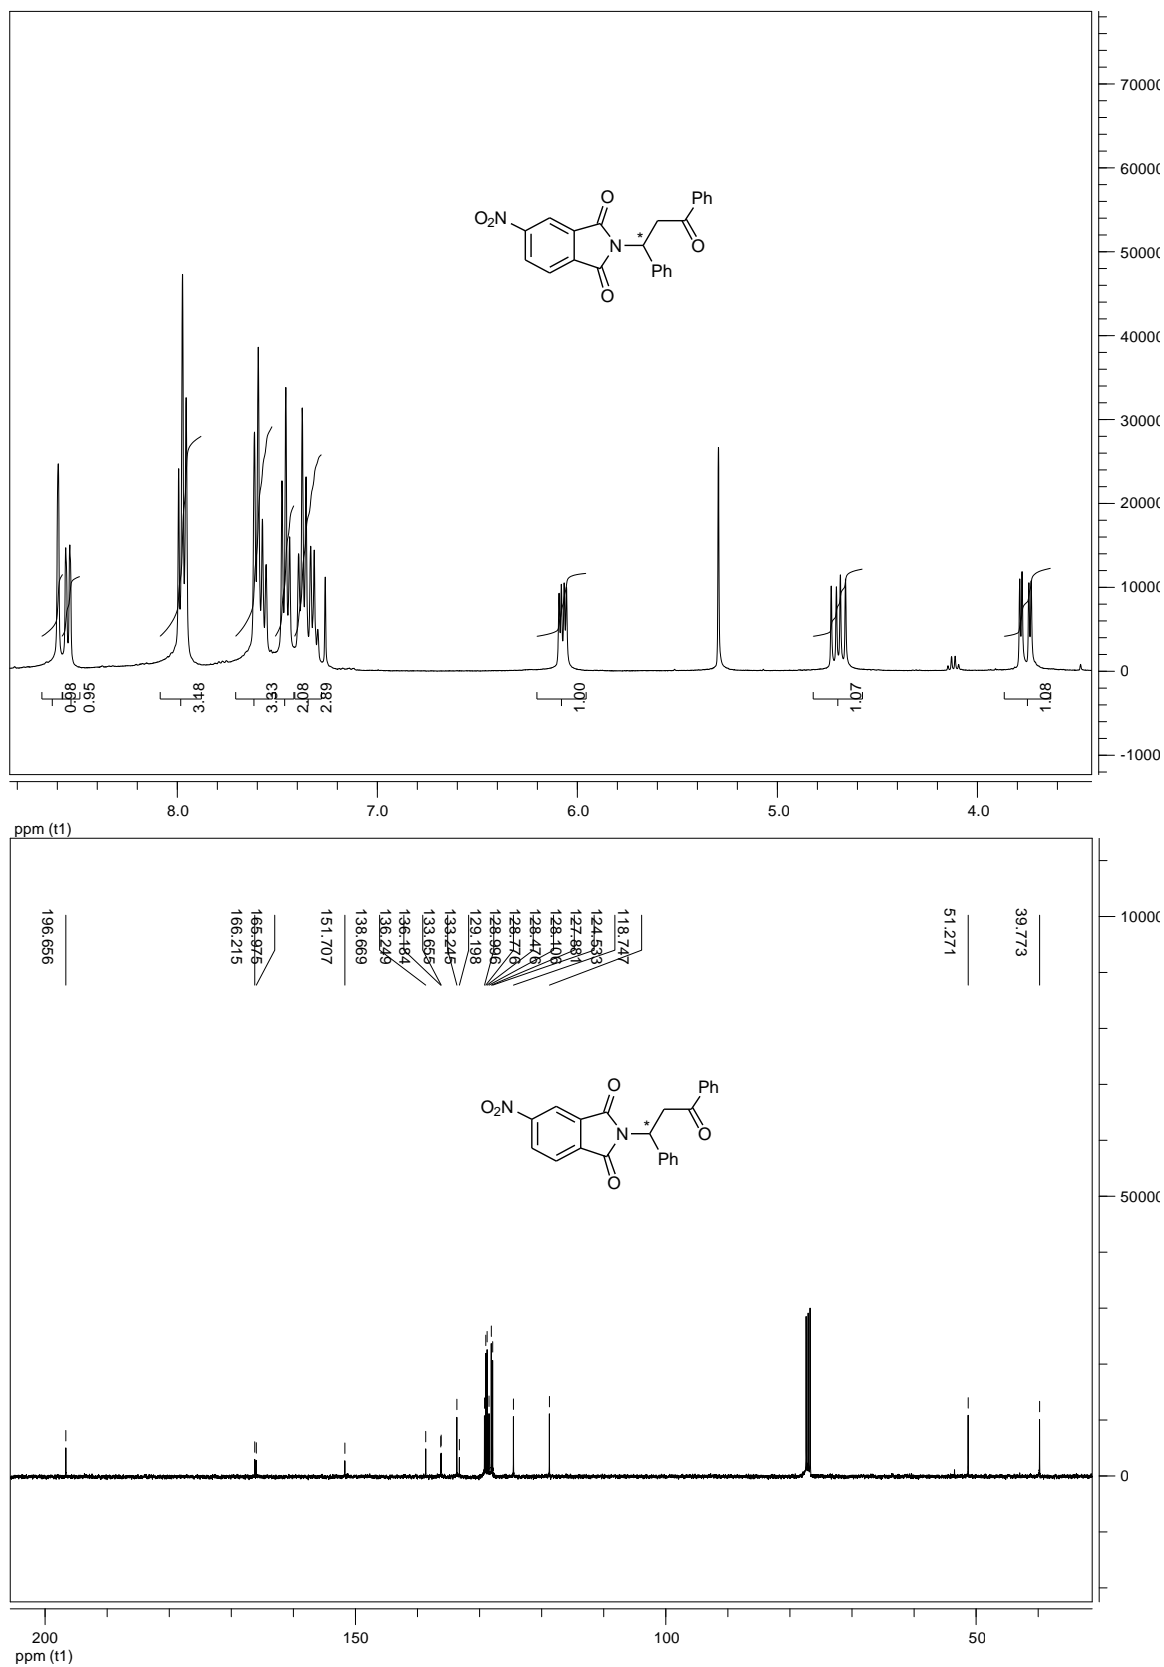

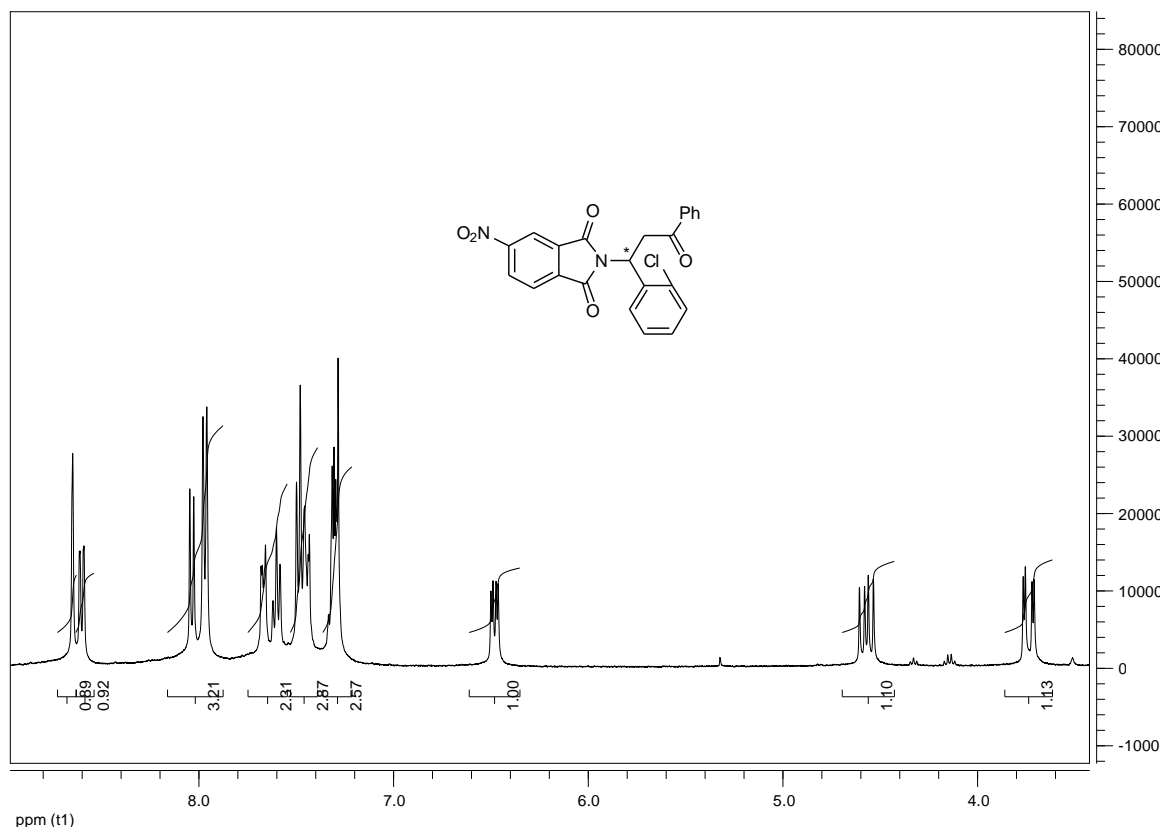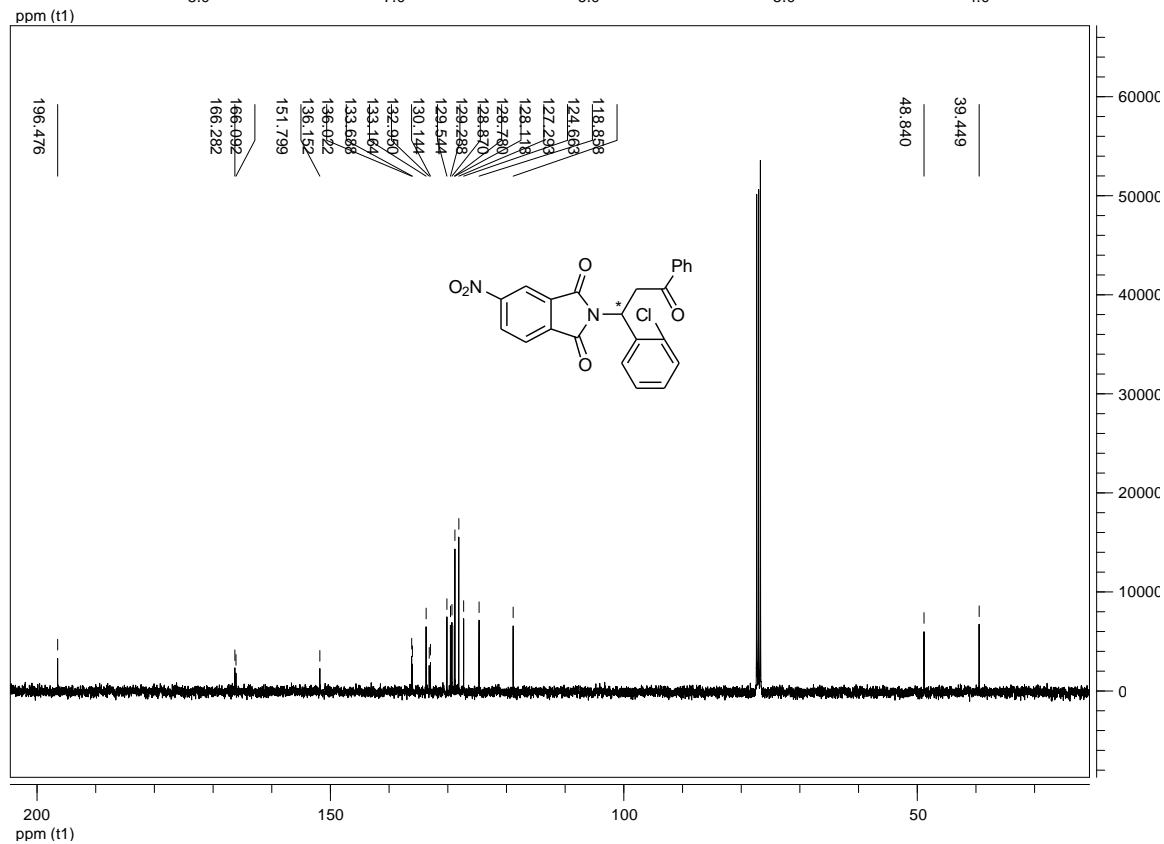

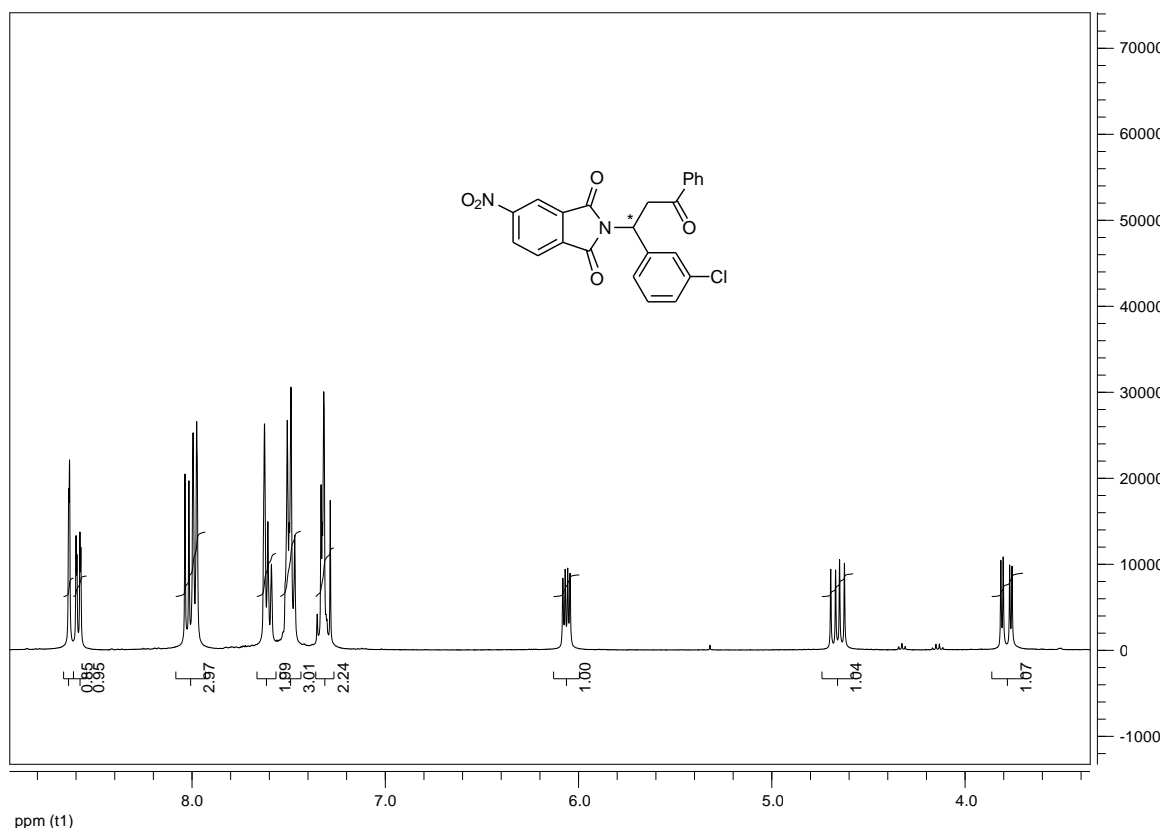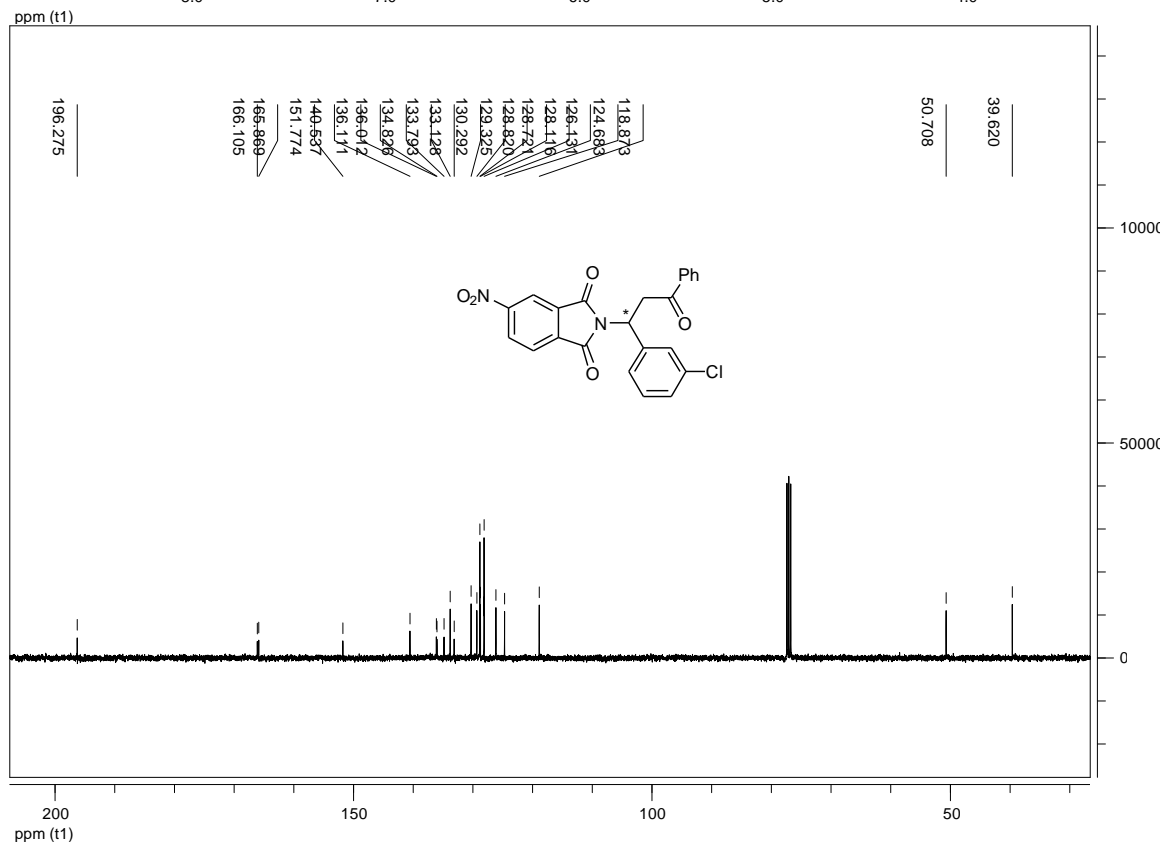

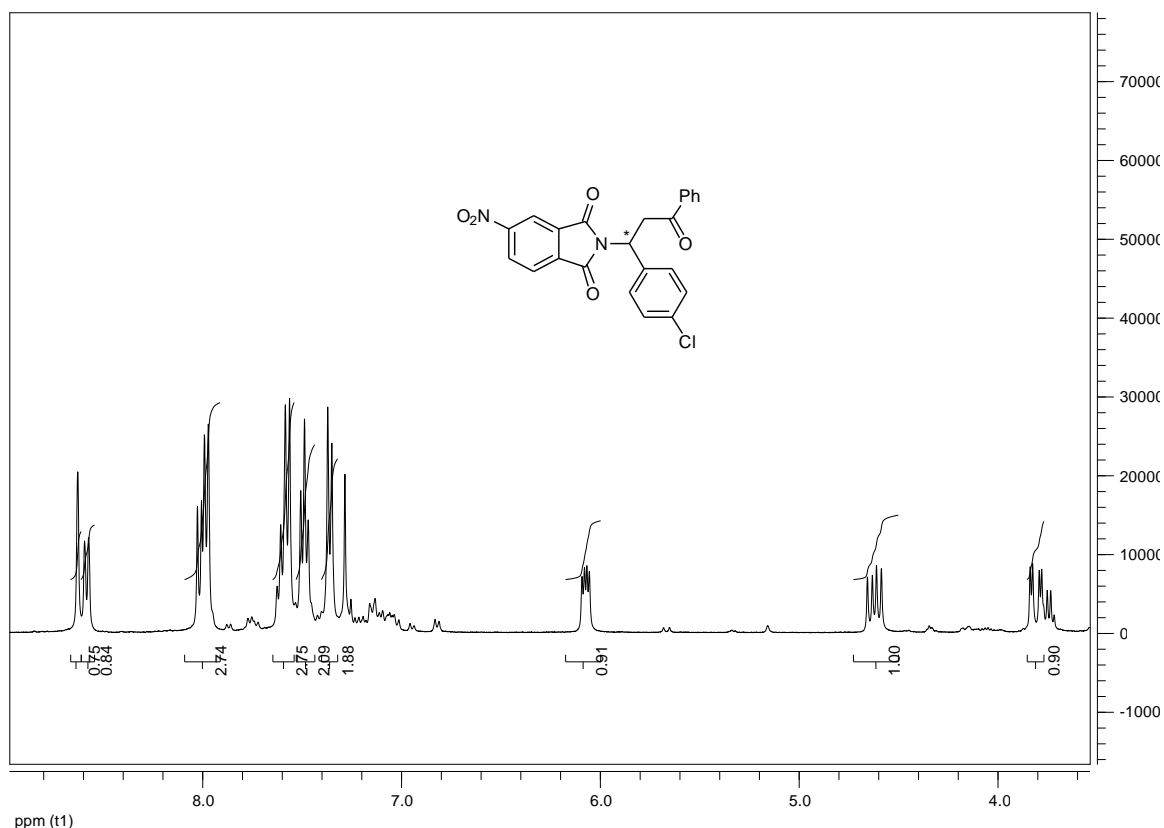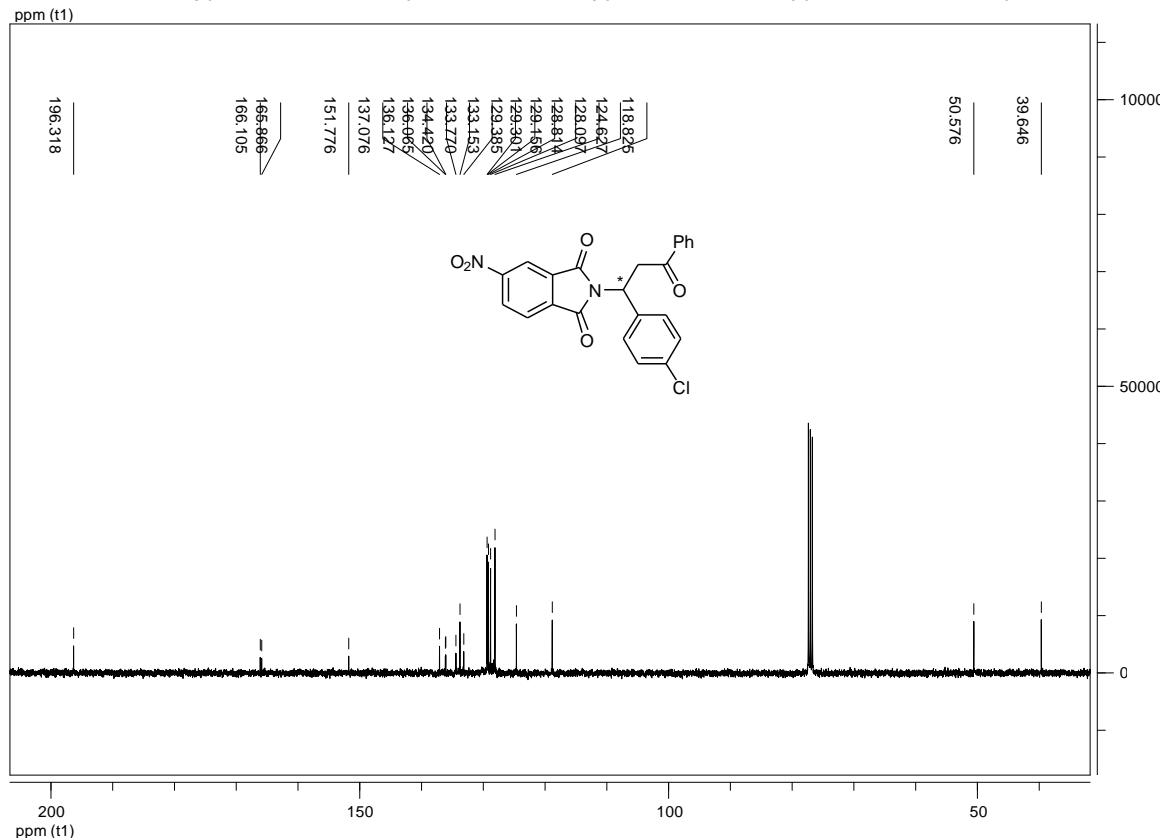

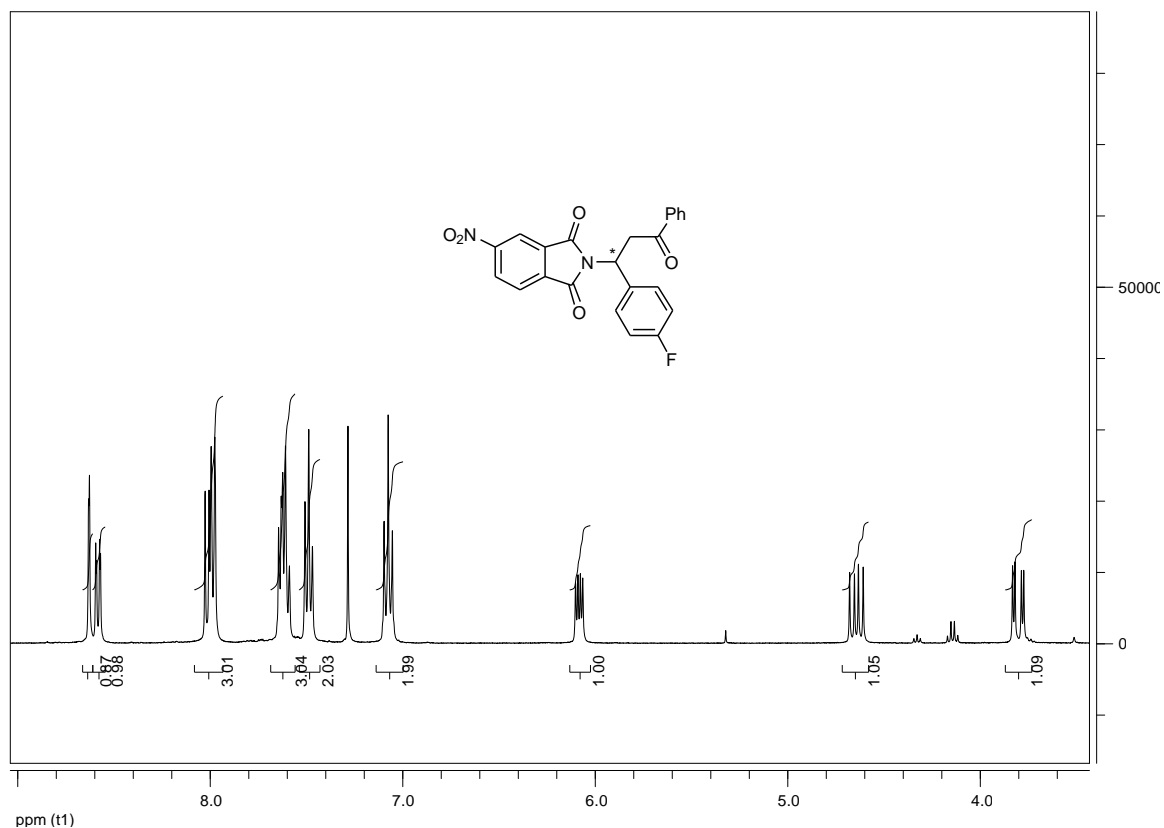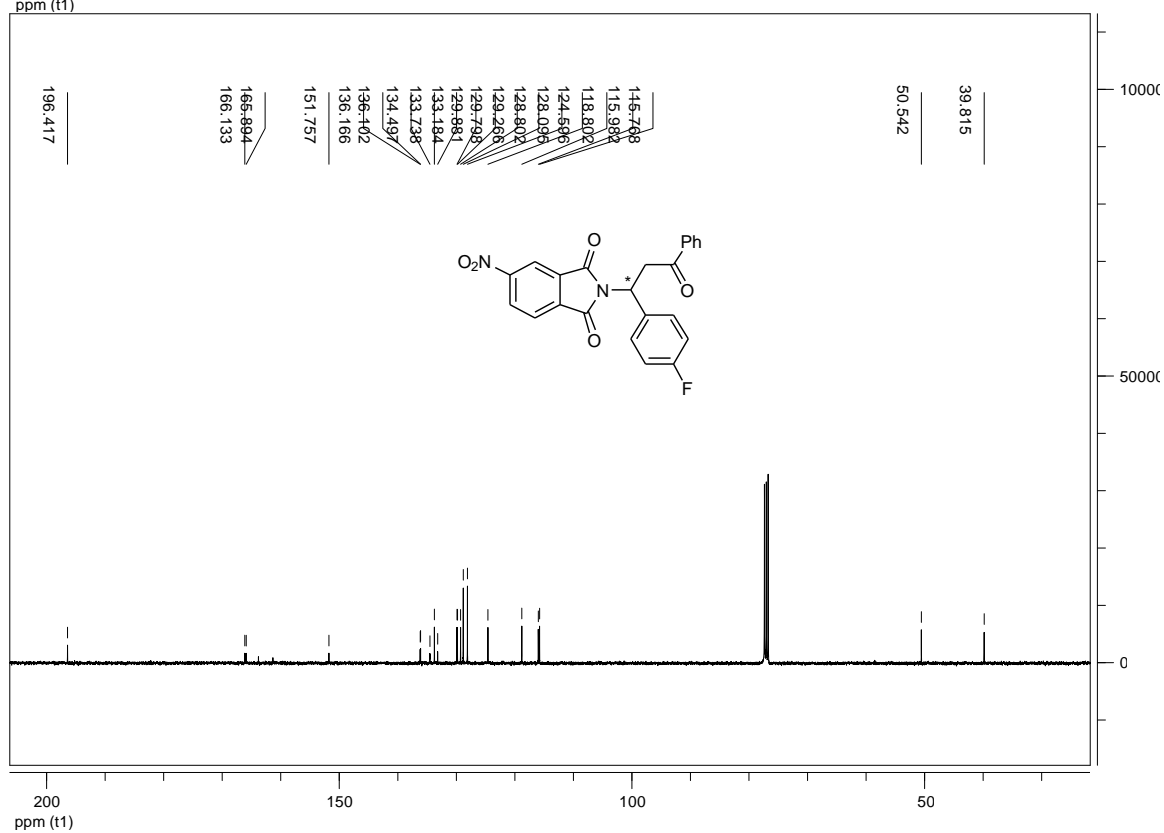

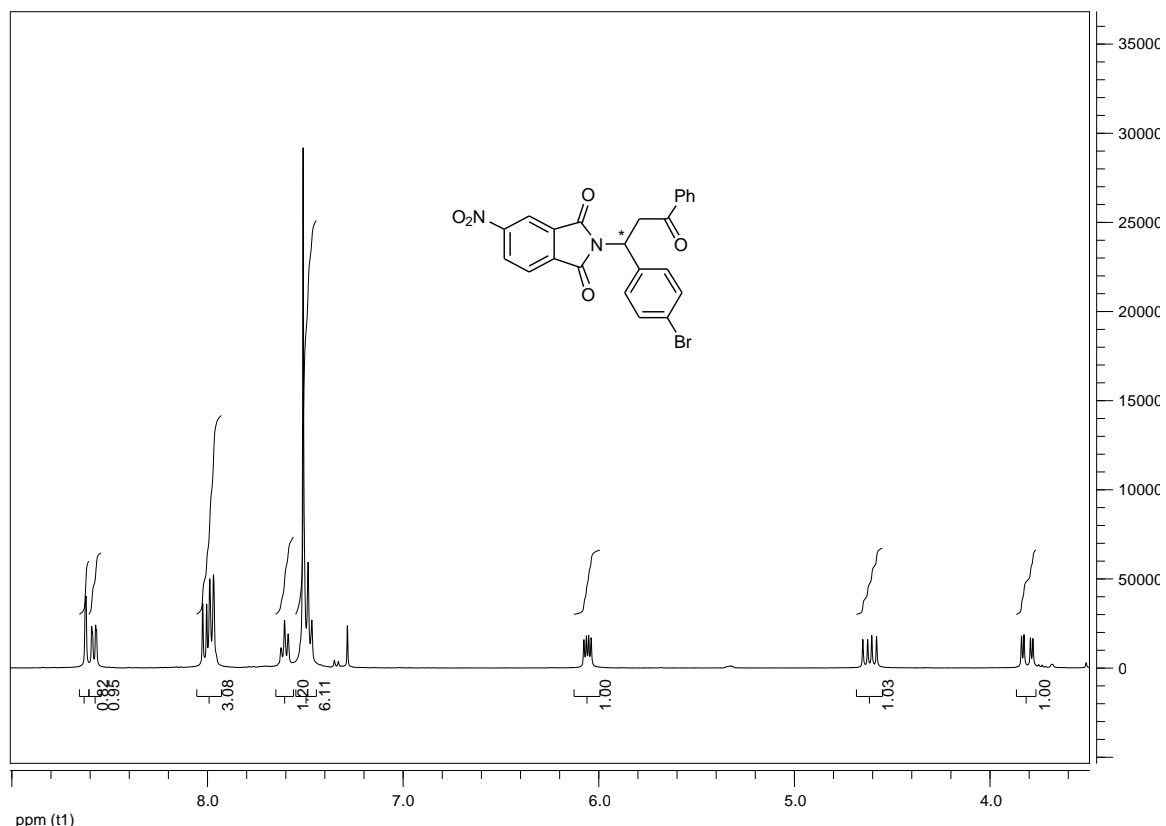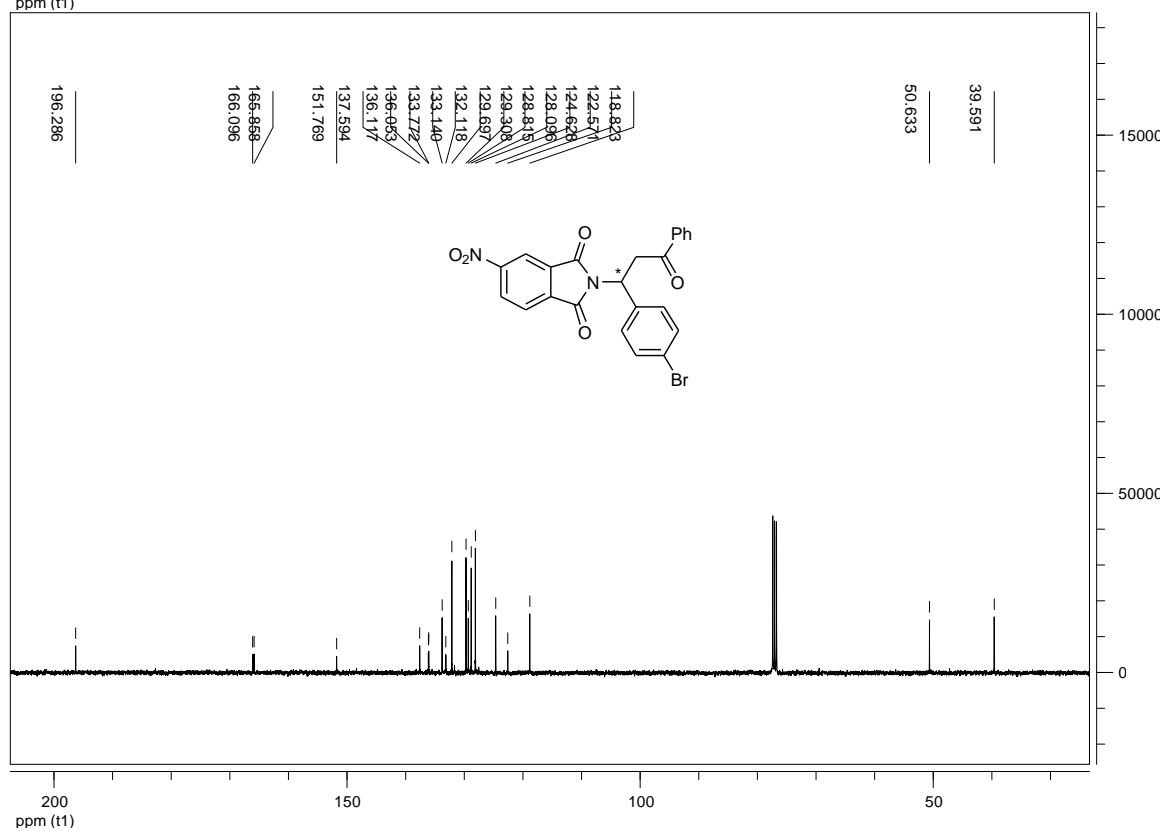

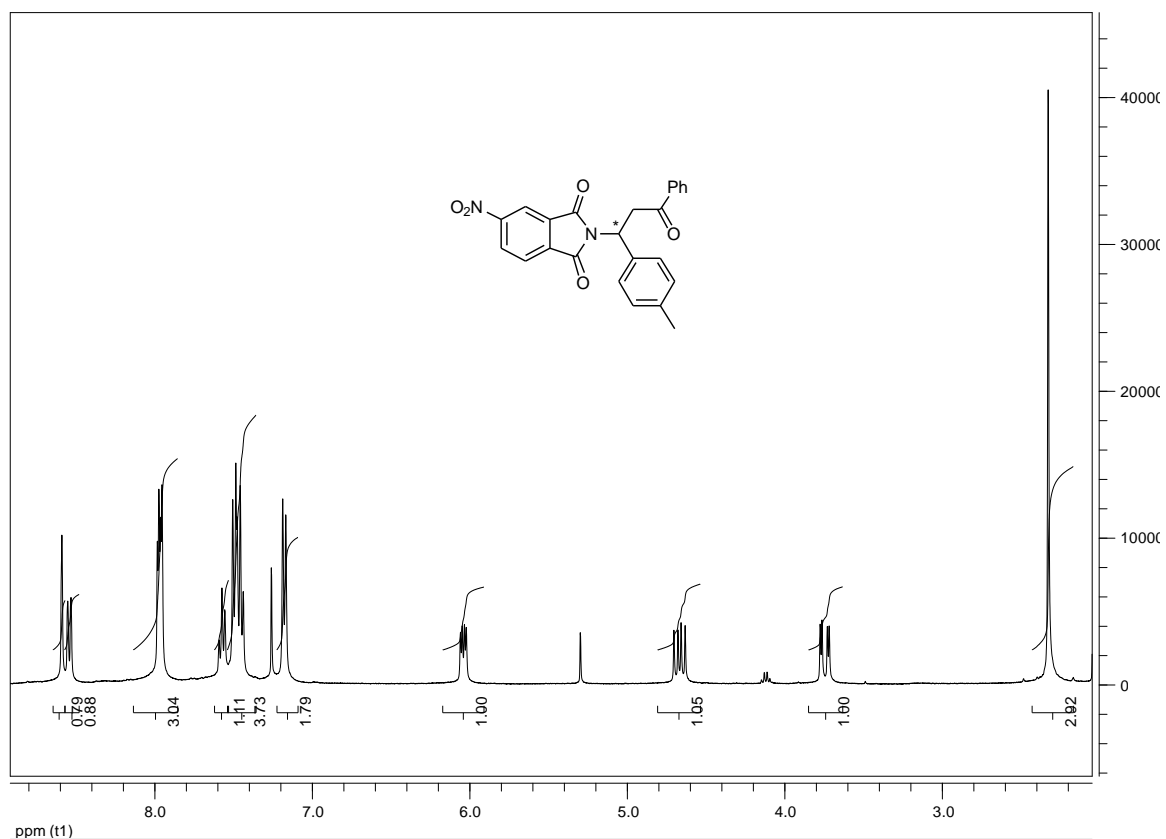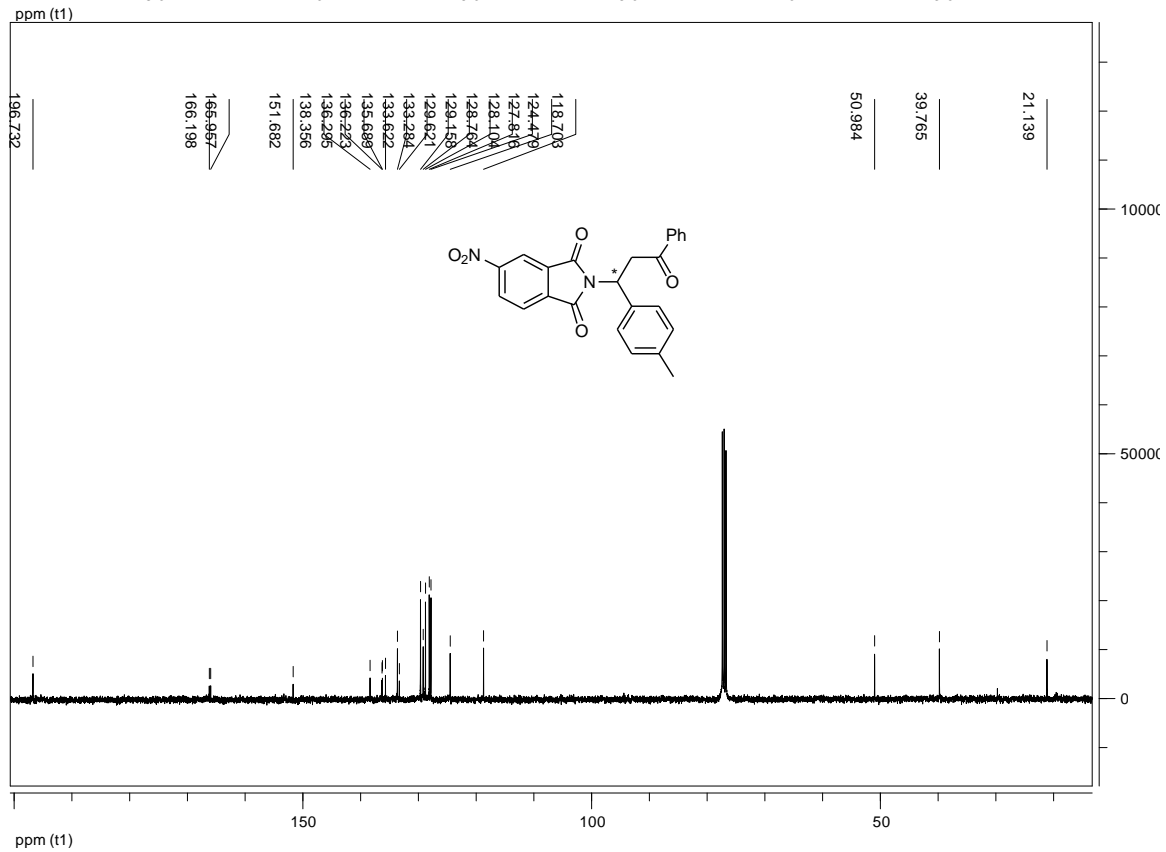

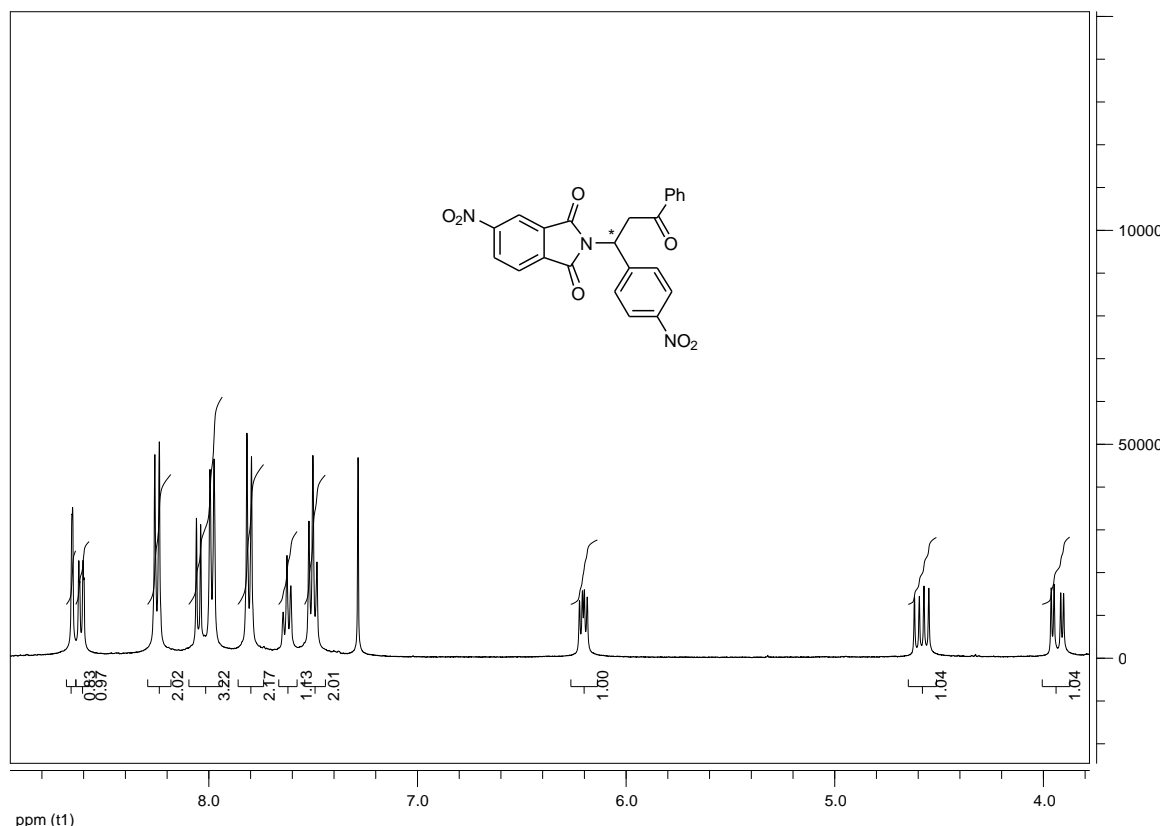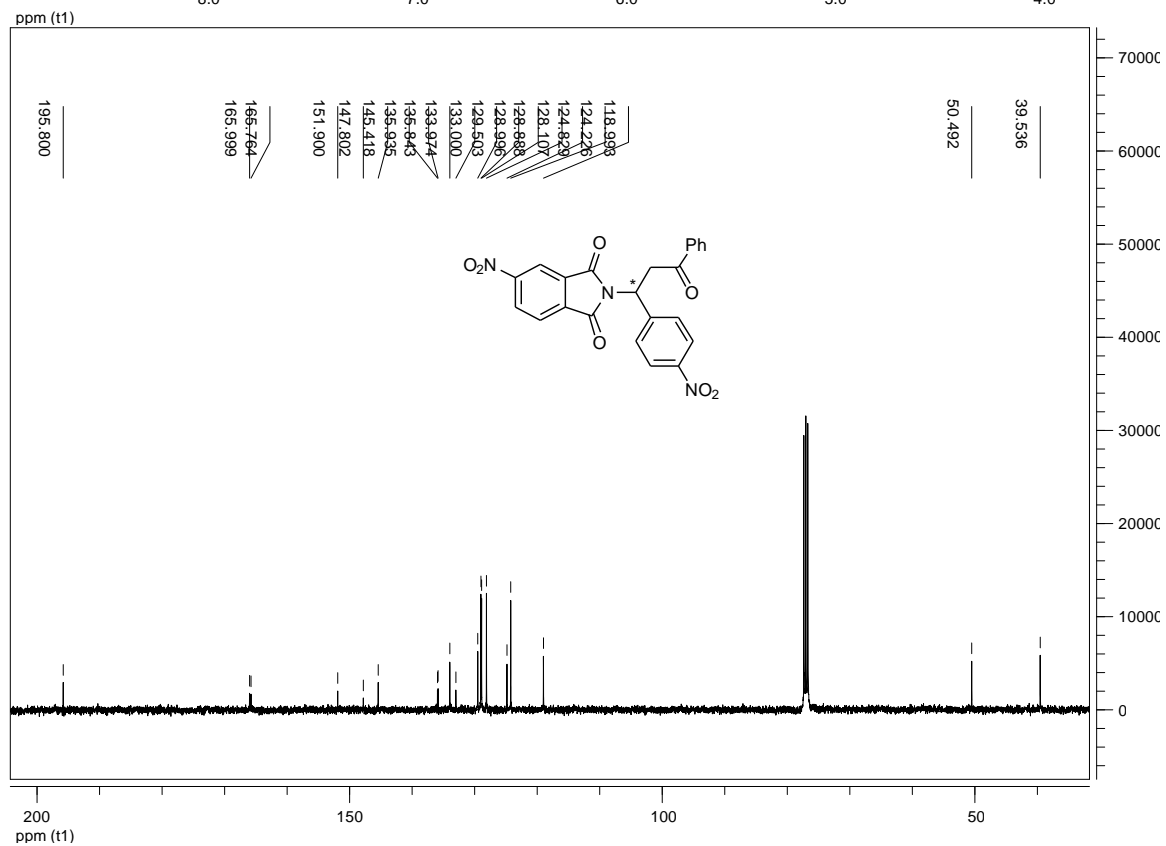



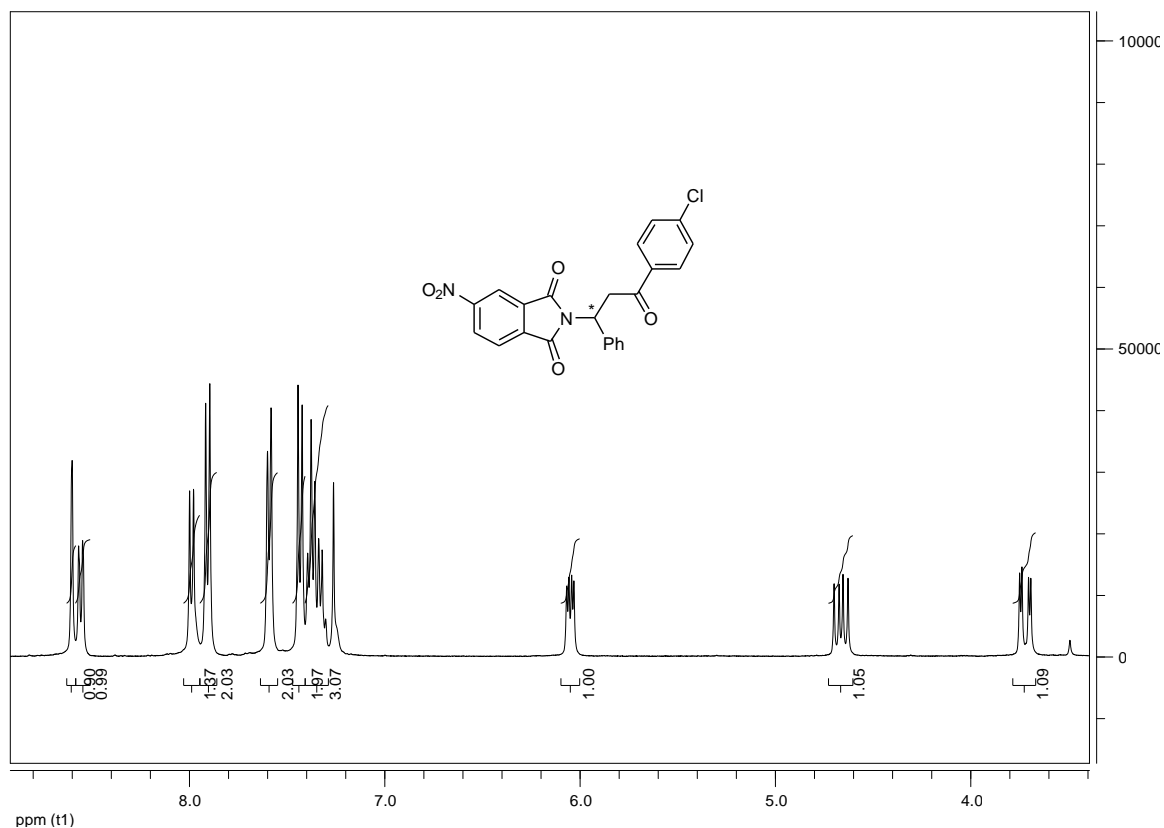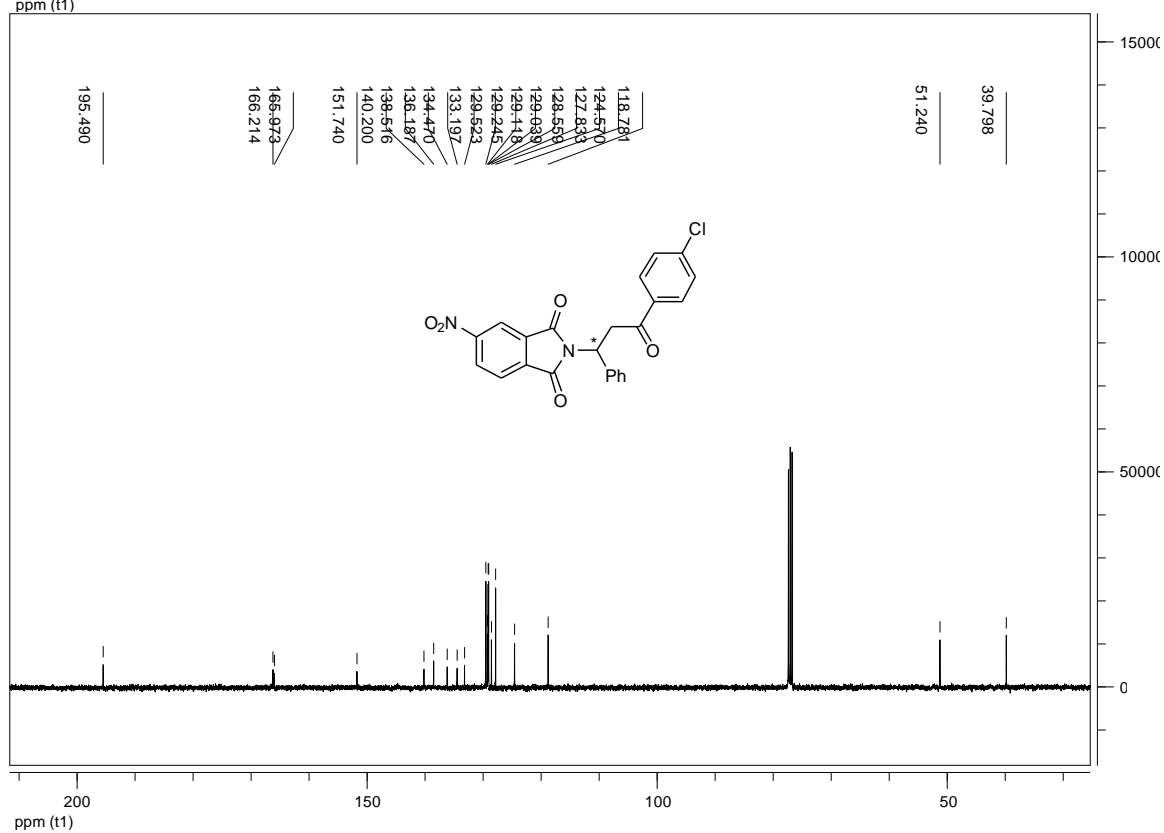

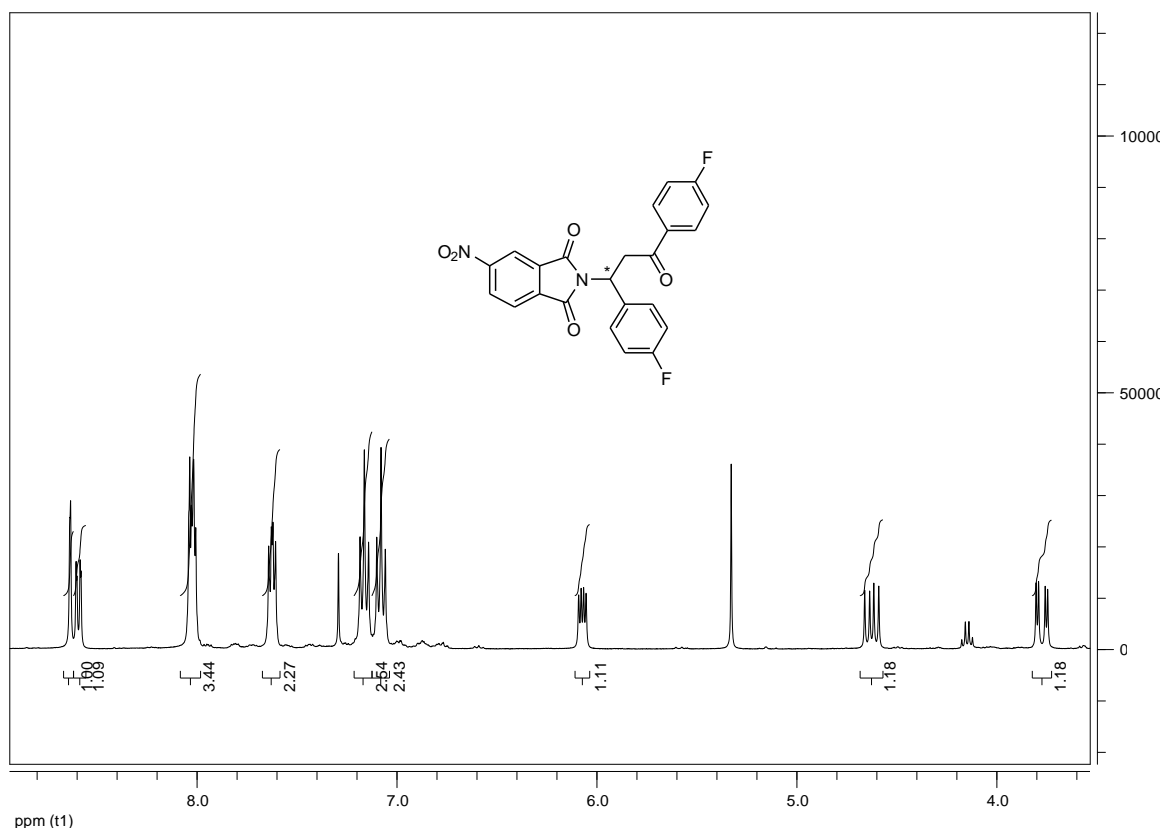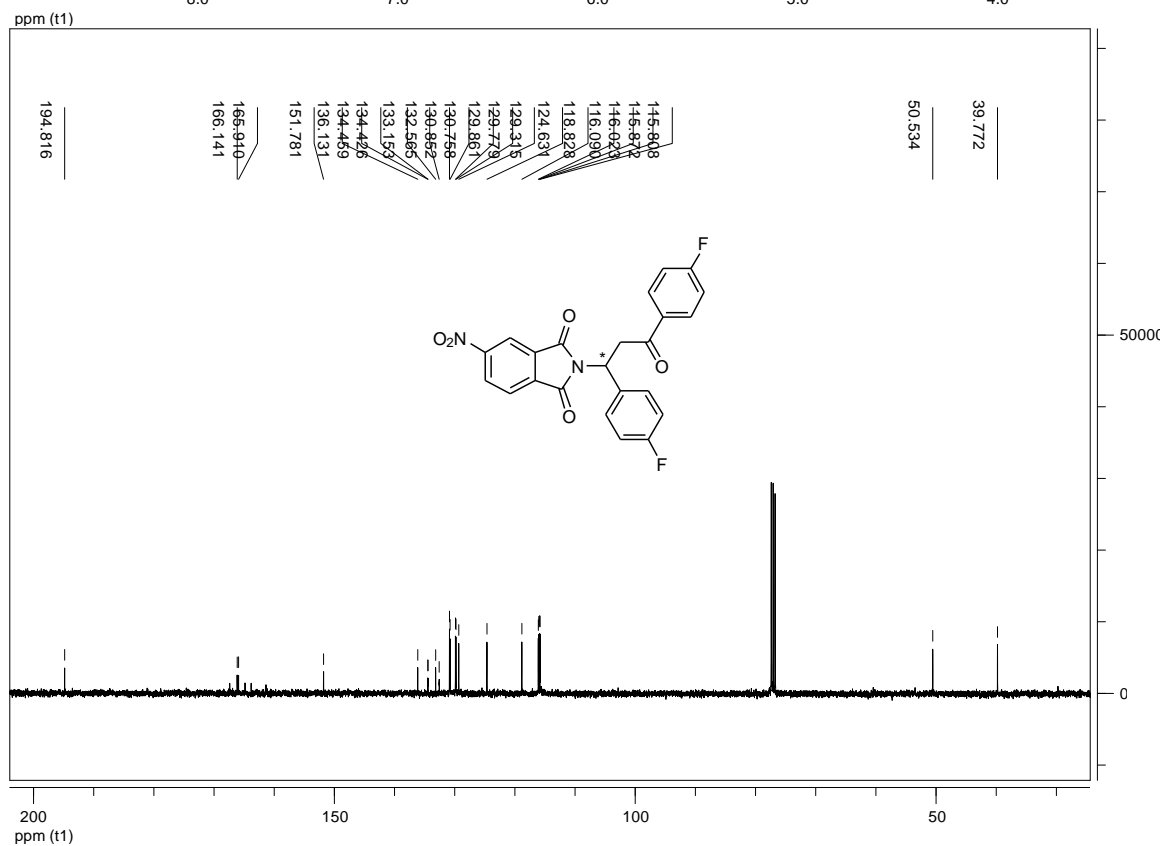

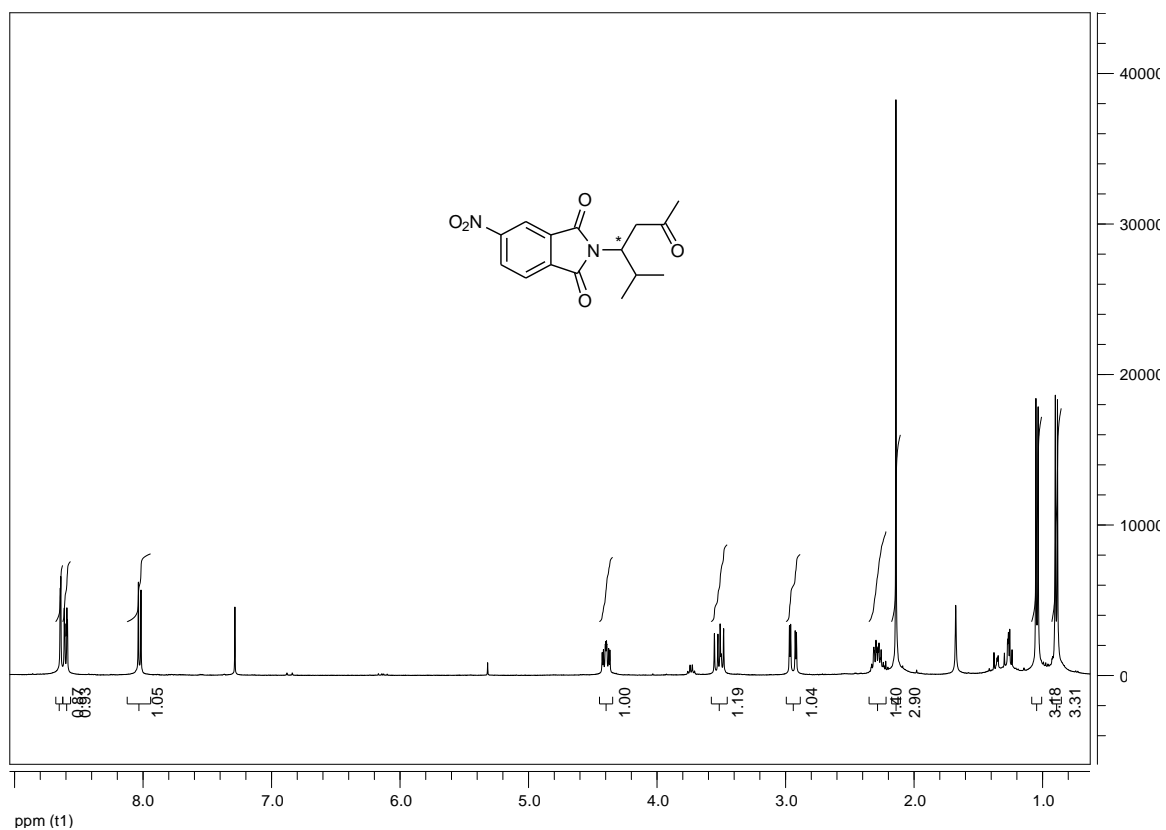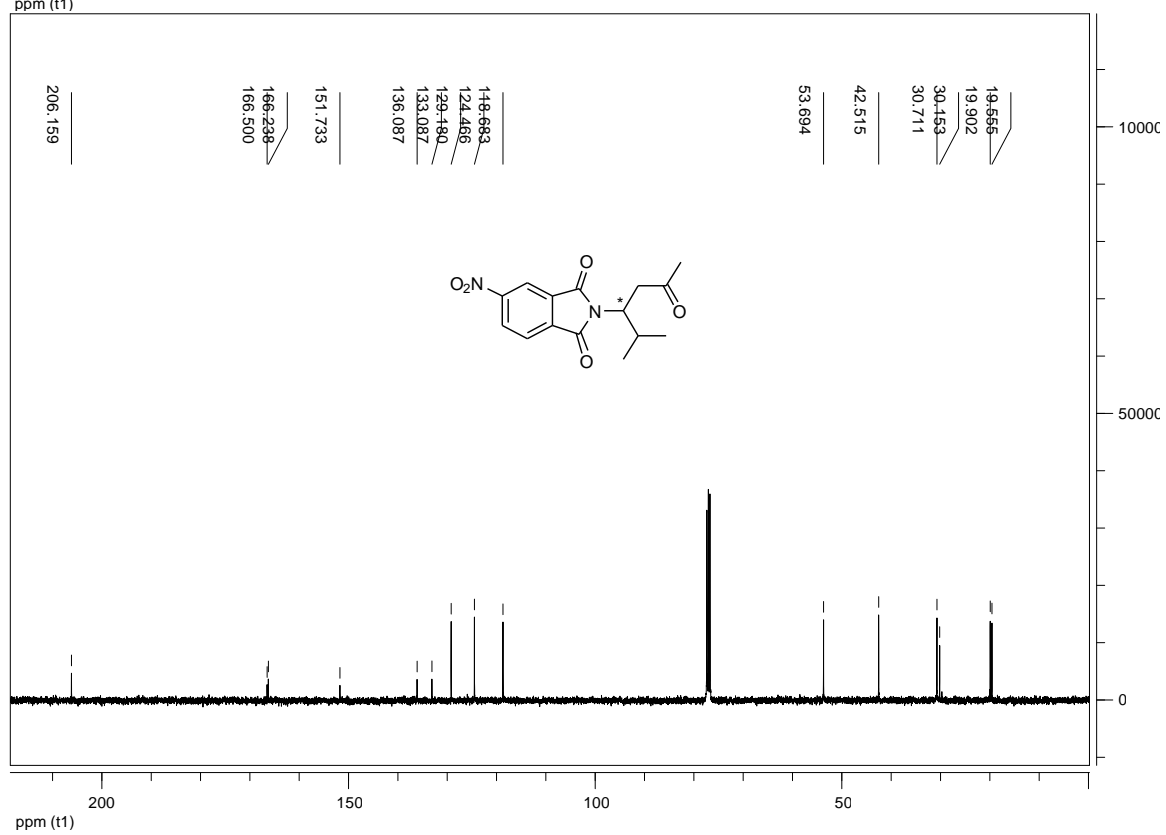

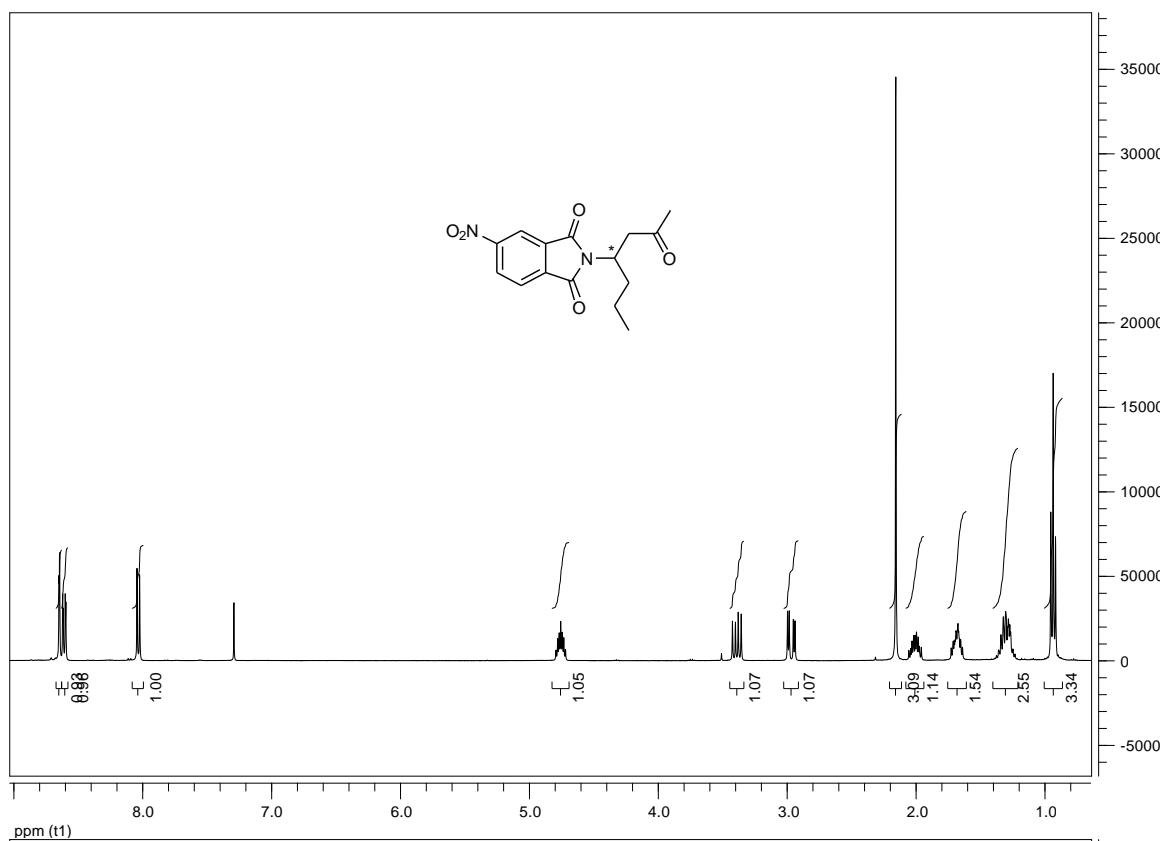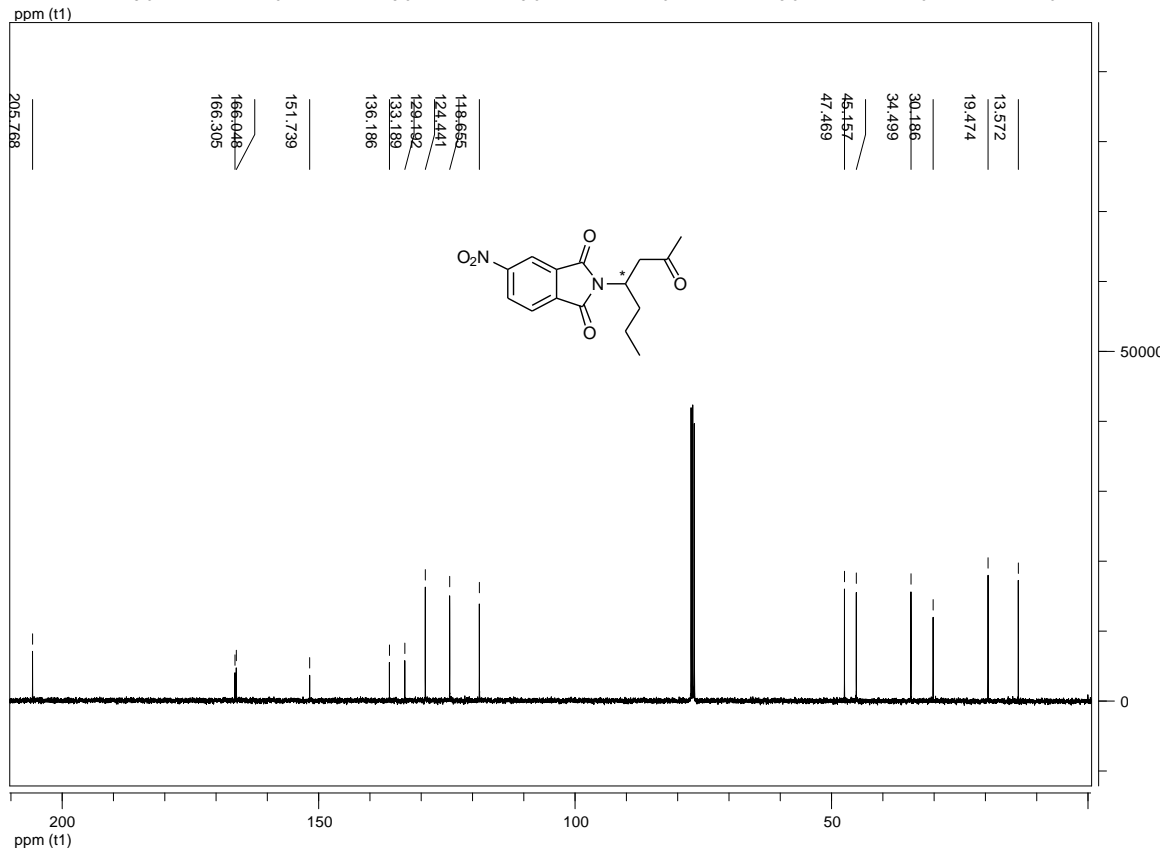

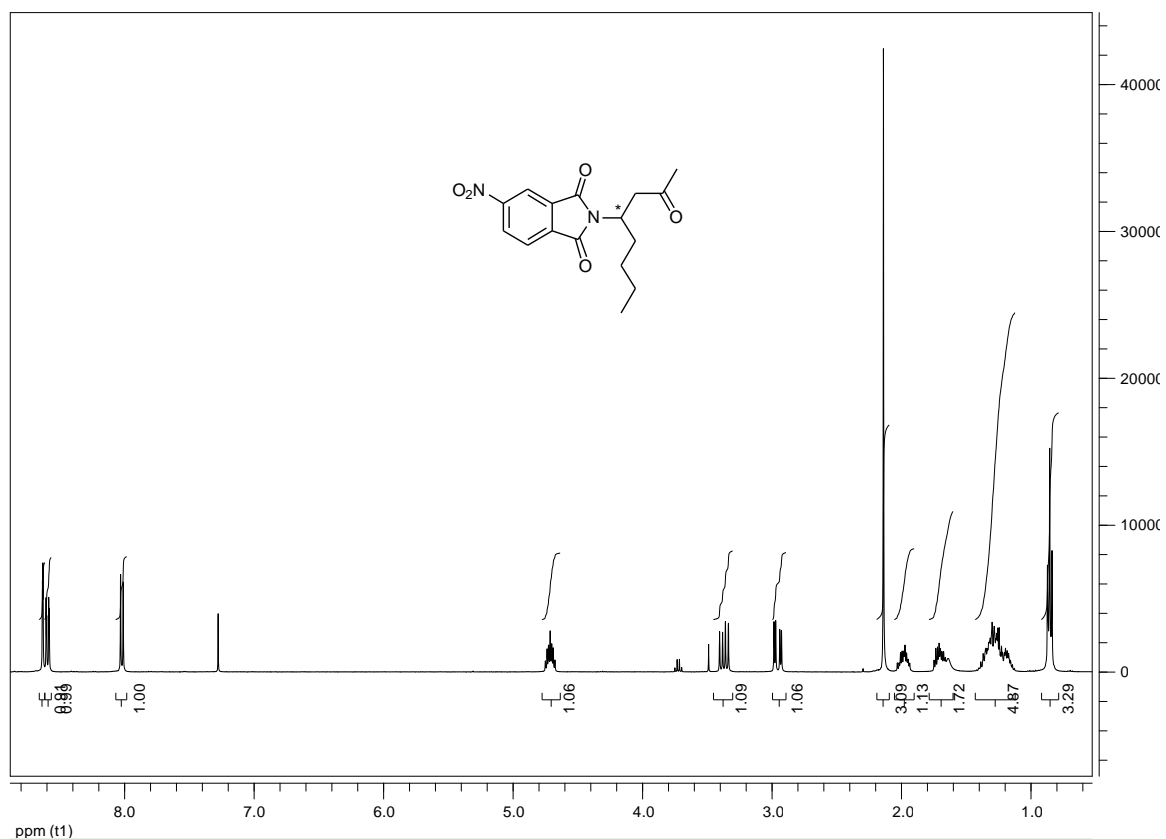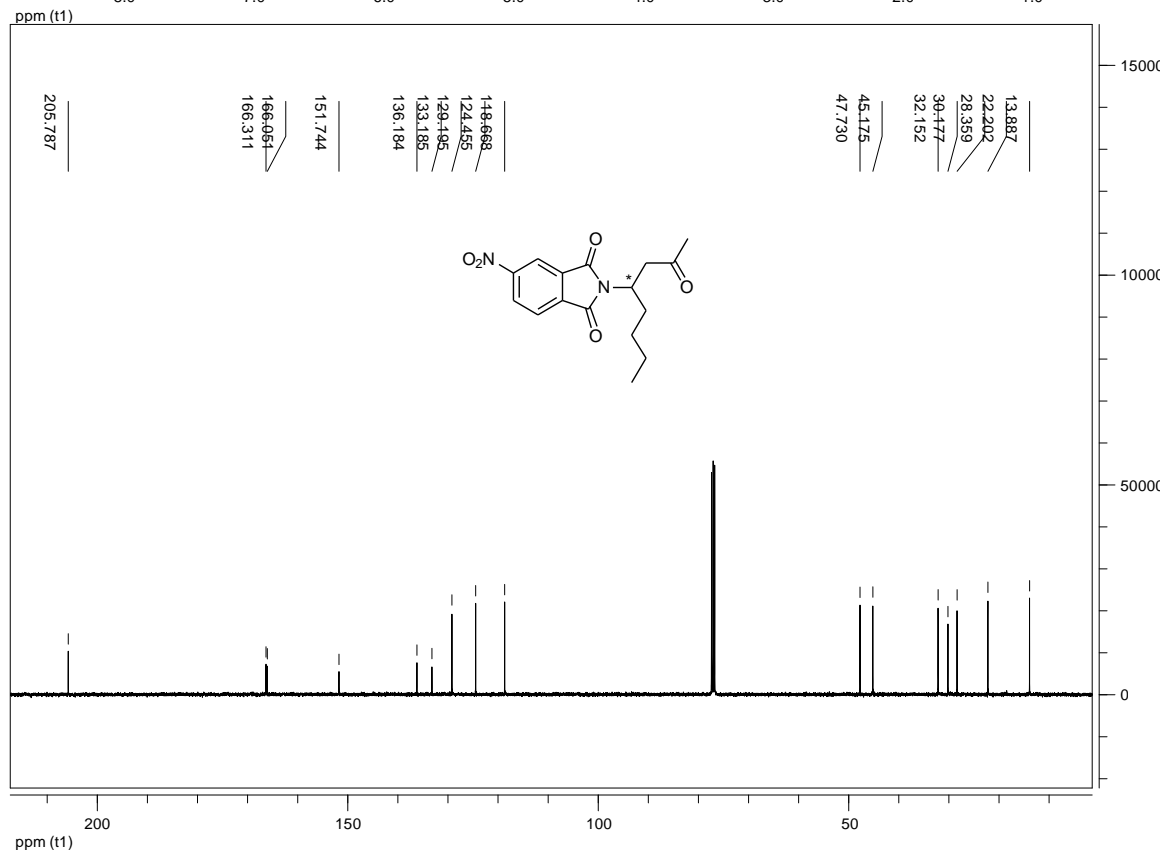

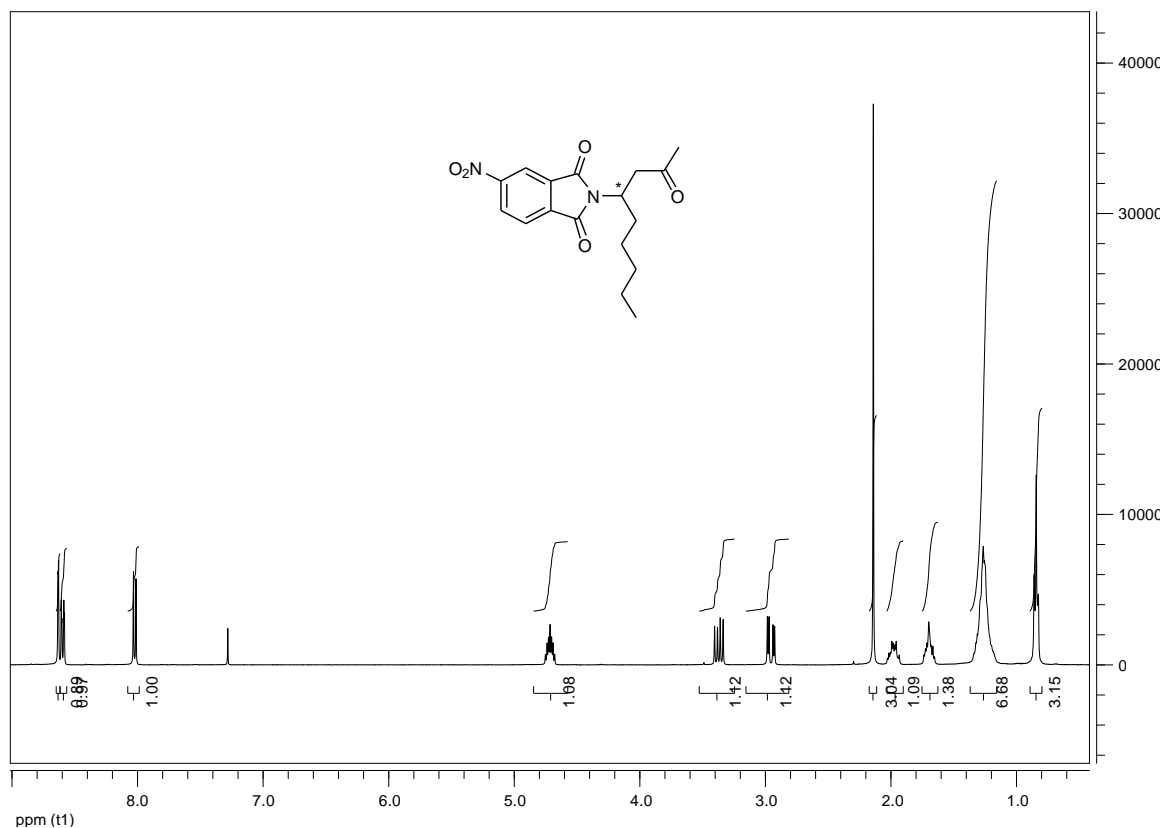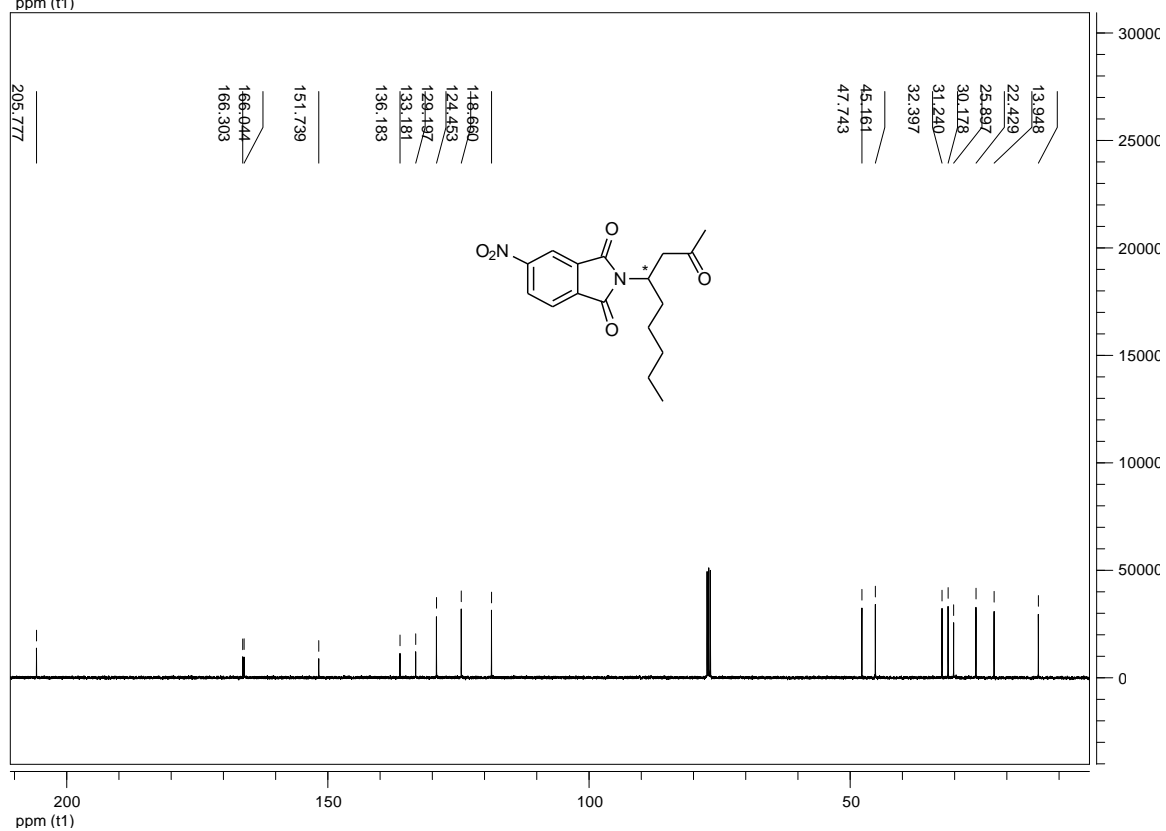

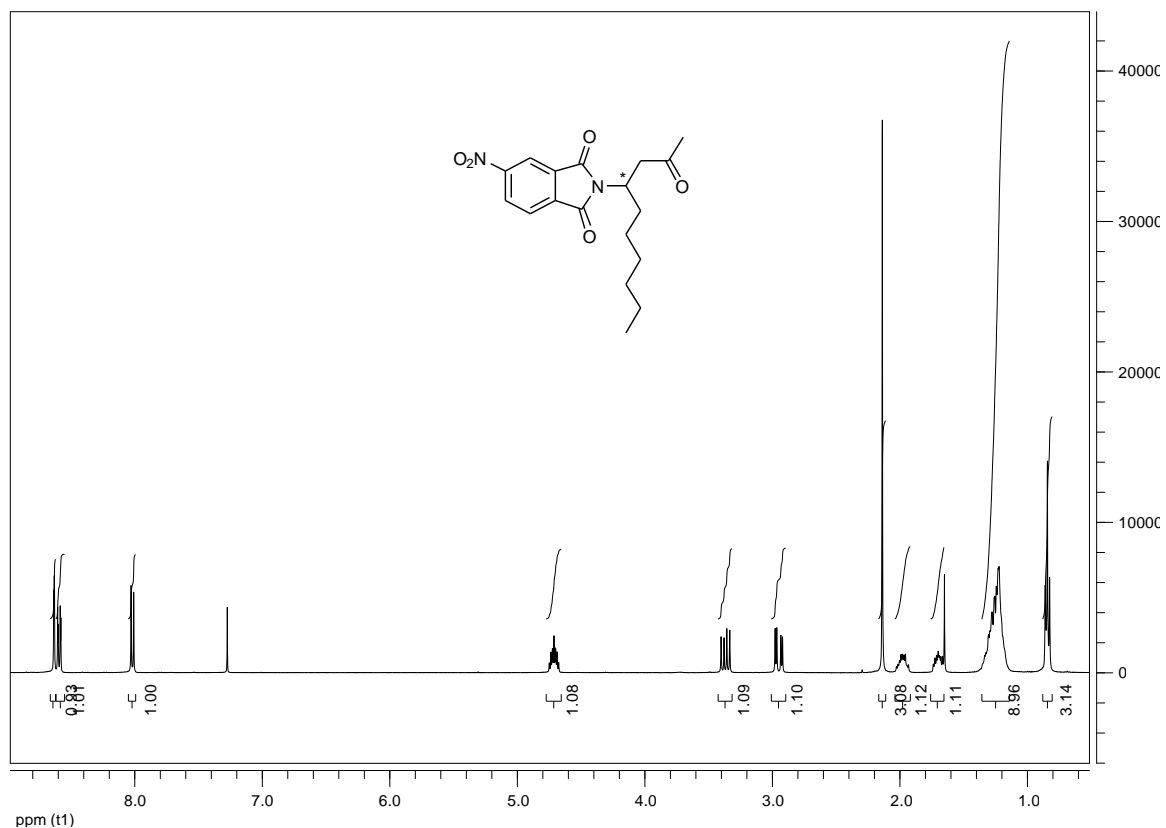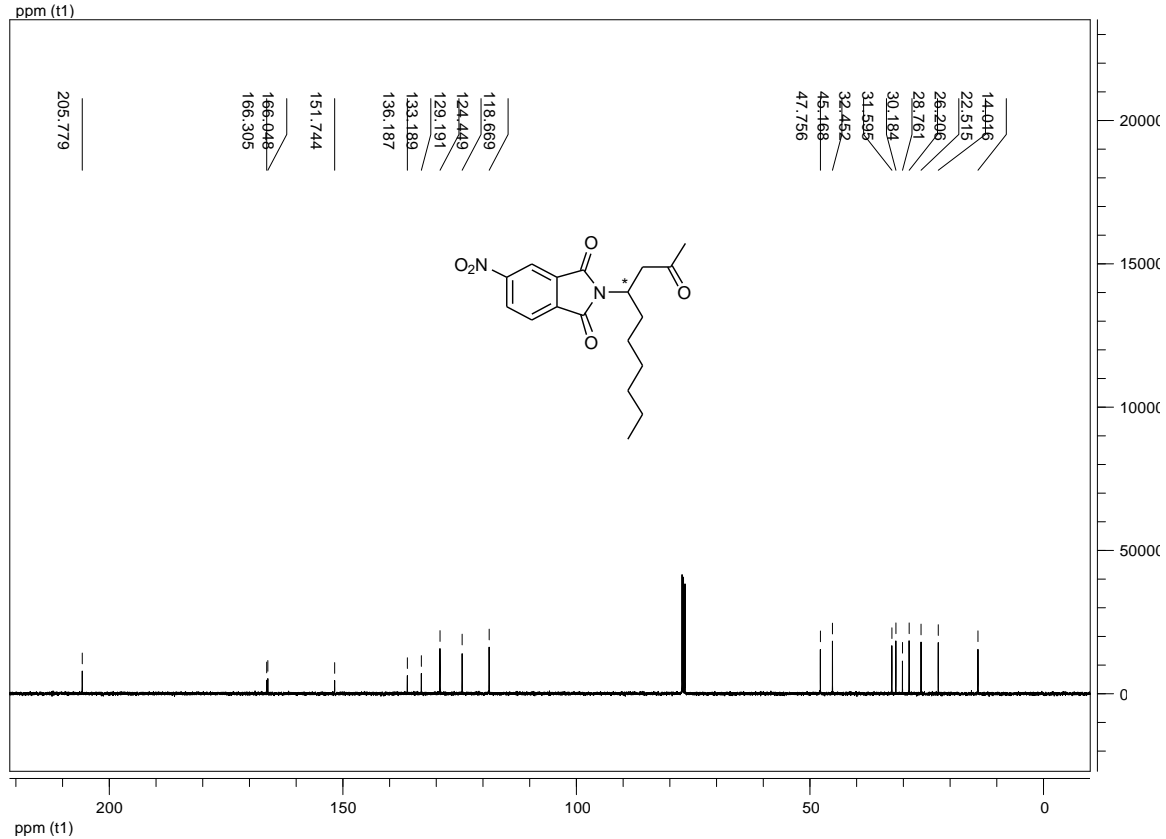

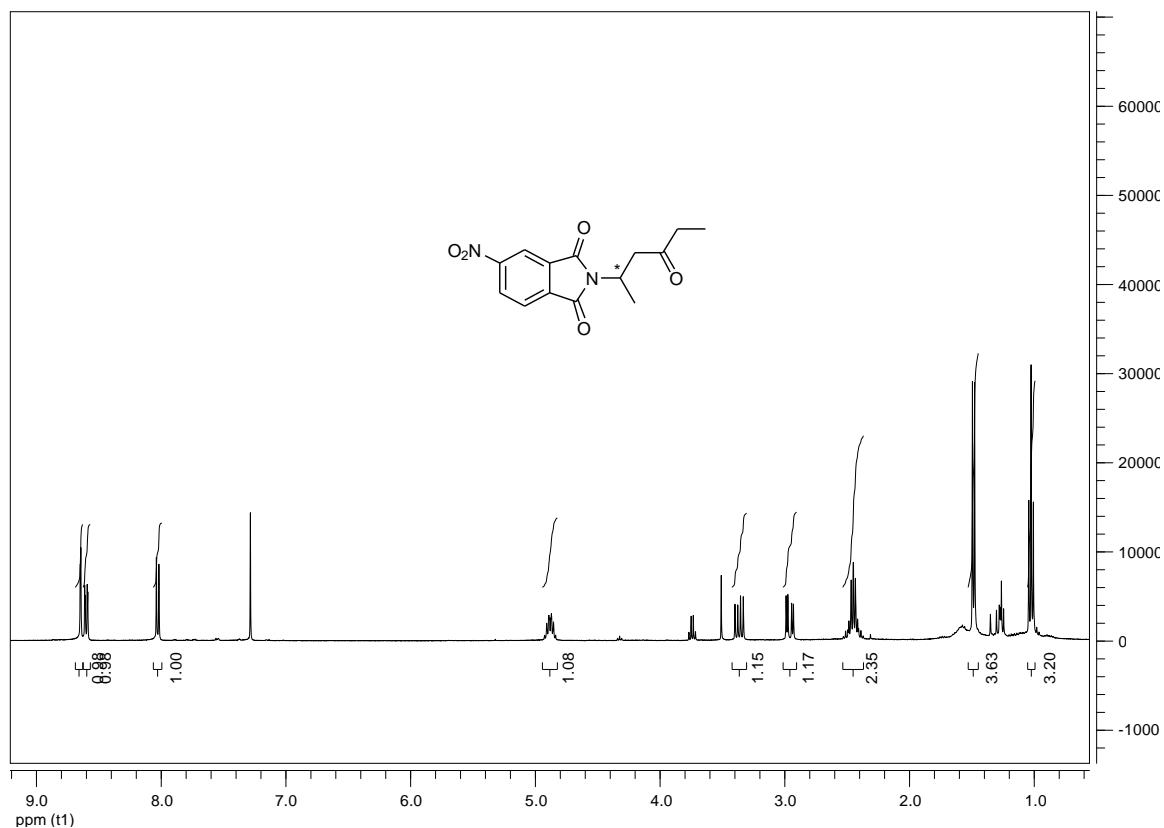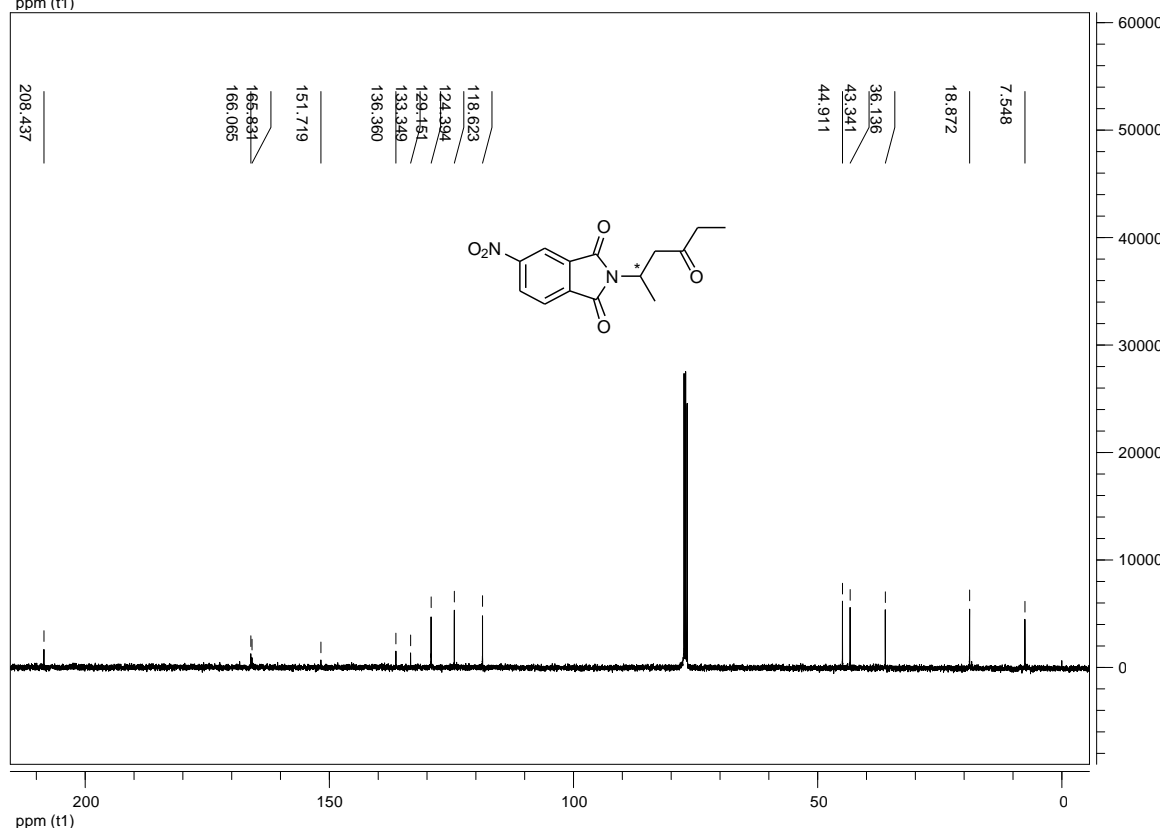



### HPLC spectra of Michael adducts 3:

#### 5-nitro-2-(3-oxo-1,3-diphenylpropyl)isoindoline-1,3-dione (3ba)

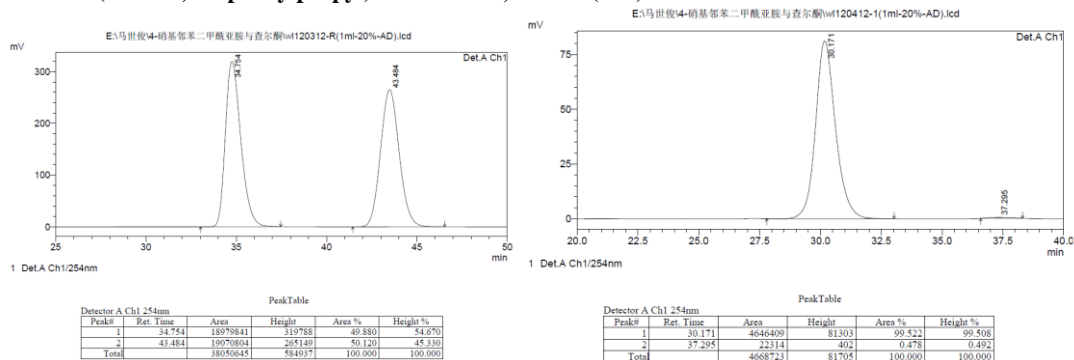

#### 2-(1-(2-chlorophenyl)-3-oxo-3-phenylpropyl)-5-nitroisoindoline-1,3-dione (3bb)

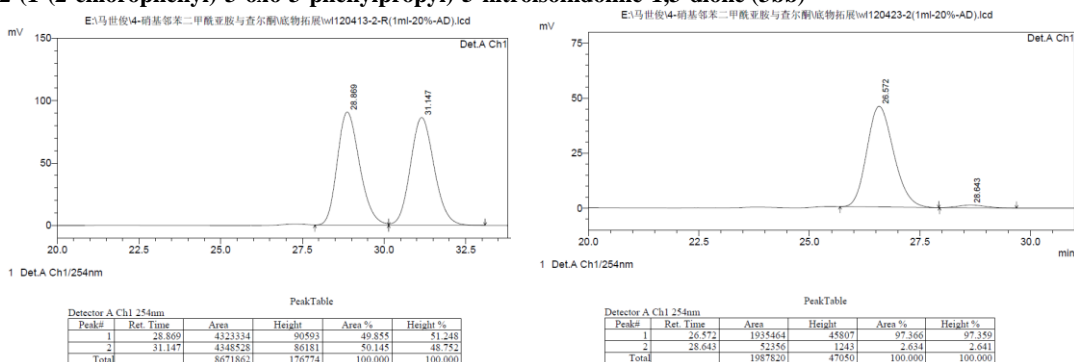

#### 2-(1-(3-chlorophenyl)-3-oxo-3-phenylpropyl)-5-nitroisoindoline-1,3-dione (3bc)

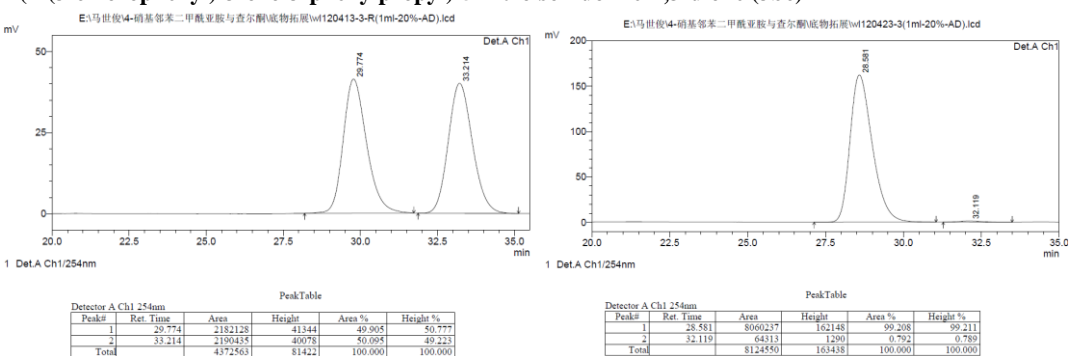

#### 2-(1-(4-chlorophenyl)-3-oxo-3-phenylpropyl)-5-nitroisoindoline-1,3-dione (3bd)

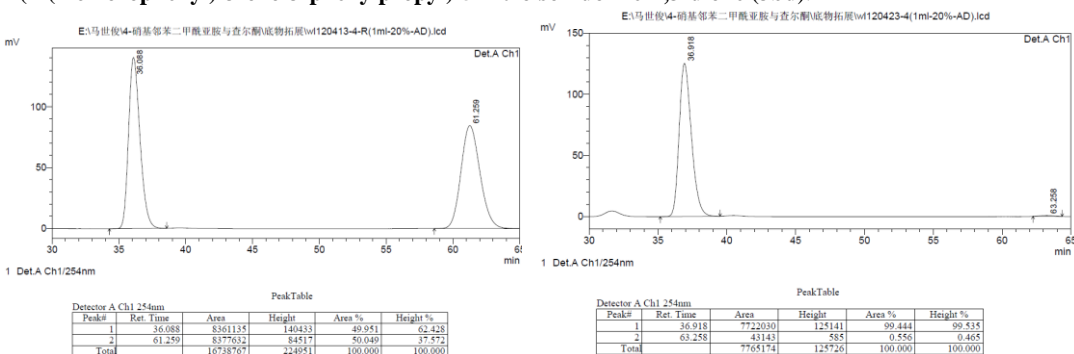

**2-(1-(4-fluorophenyl)-3-oxo-3-phenylpropyl)-5-nitroisindoline-1,3-dione (3be)**

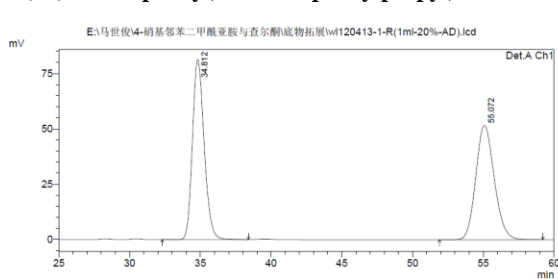

1 Det.A Ch1/254nm

| PeakTable |           |         |        |         |          |
|-----------|-----------|---------|--------|---------|----------|
| Peak#     | Ret. Time | Area    | Height | Area %  | Height % |
| 1         | 34.812    | 4674542 | 81328  | 49.982  | 61.169   |
| 2         | 56.072    | 4677928 | 51628  | 80.018  | 38.831   |
| Total     |           | 9352480 | 132956 | 100.000 | 100.000  |

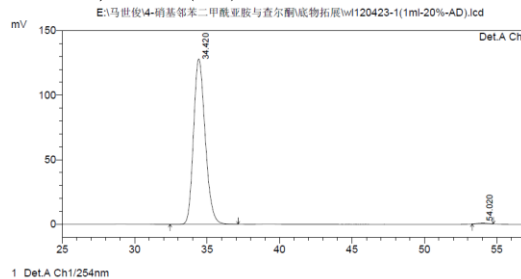

1 Det.A Ch1/254nm

| PeakTable |           |         |        |         |          |
|-----------|-----------|---------|--------|---------|----------|
| Peak#     | Ret. Time | Area    | Height | Area %  | Height % |
| 1         | 34.420    | 7157848 | 128042 | 99.608  | 99.584   |
| 2         | 54.020    | 28143   | 535    | 0.392   | 0.416    |
| Total     |           | 7185991 | 128578 | 100.000 | 100.000  |

**2-(1-(4-bromophenyl)-3-oxo-3-phenylpropyl)-5-nitroisindoline-1,3-dione (3bf)**

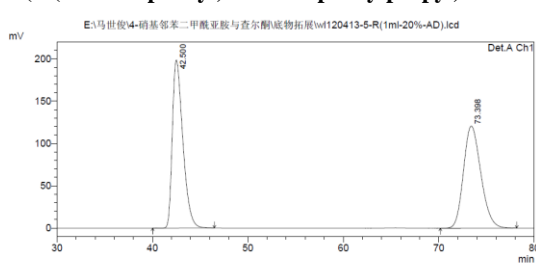

1 Det.A Ch1/254nm

| PeakTable |           |          |        |         |          |
|-----------|-----------|----------|--------|---------|----------|
| Peak#     | Ret. Time | Area     | Height | Area %  | Height % |
| 1         | 42.500    | 15211776 | 198489 | 49.900  | 62.185   |
| 2         | 73.398    | 15222668 | 129763 | 60.100  | 37.815   |
| Total     |           | 30484484 | 319353 | 100.000 | 100.000  |

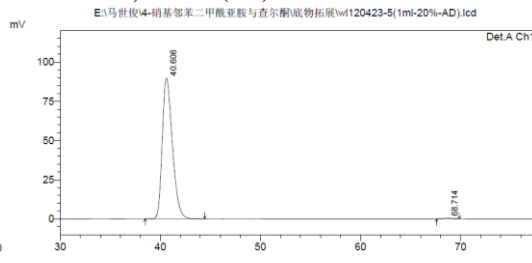

1 Det.A Ch1/254nm

| PeakTable |           |         |        |         |          |
|-----------|-----------|---------|--------|---------|----------|
| Peak#     | Ret. Time | Area    | Height | Area %  | Height % |
| 1         | 40.606    | 6305492 | 89702  | 99.253  | 99.512   |
| 2         | 68.714    | 34667   | 439    | 0.547   | 0.488    |
| Total     |           | 6340159 | 90141  | 100.000 | 100.000  |

**5-nitro-2-(3-oxo-3-phenyl-1-p-tolylpropyl)isindoline-1,3-dione (3bg)**

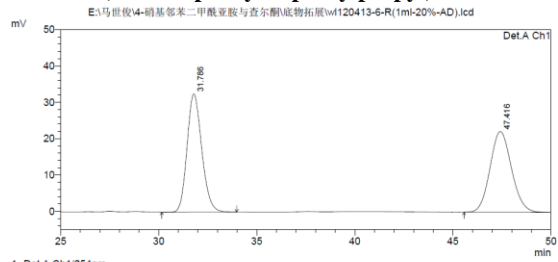

1 Det.A Ch1/254nm

| PeakTable |           |         |        |         |          |
|-----------|-----------|---------|--------|---------|----------|
| Peak#     | Ret. Time | Area    | Height | Area %  | Height % |
| 1         | 31.786    | 1699783 | 32562  | 50.081  | 59.400   |
| 2         | 47.416    | 1694295 | 22257  | 49.919  | 40.600   |
| Total     |           | 3394078 | 54819  | 100.000 | 100.000  |

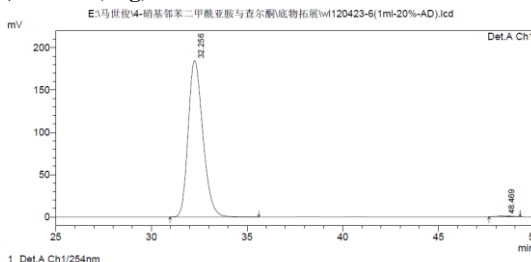

1 Det.A Ch1/254nm

| PeakTable |           |         |        |         |          |
|-----------|-----------|---------|--------|---------|----------|
| Peak#     | Ret. Time | Area    | Height | Area %  | Height % |
| 1         | 32.256    | 9802350 | 184931 | 99.517  | 99.543   |
| 2         | 48.469    | 47913   | 549    | 0.483   | 0.457    |
| Total     |           | 9910264 | 185781 | 100.000 | 100.000  |

**5-nitro-2-(1-(4-nitrophenyl)-3-oxo-3-phenylpropyl)isindoline-1,3-dione (3bh)**

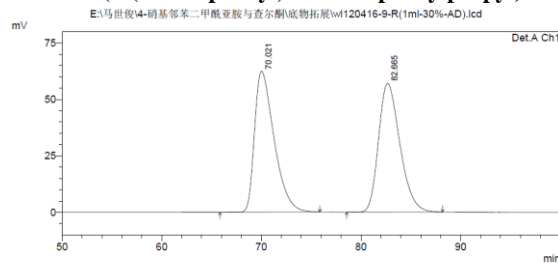

1 Det.A Ch1/254nm

| PeakTable |           |          |        |         |          |
|-----------|-----------|----------|--------|---------|----------|
| Peak#     | Ret. Time | Area     | Height | Area %  | Height % |
| 1         | 70.021    | 8517373  | 62401  | 50.011  | 52.236   |
| 2         | 82.095    | 8513766  | 57058  | 49.989  | 47.764   |
| Total     |           | 17031129 | 119458 | 100.000 | 100.000  |

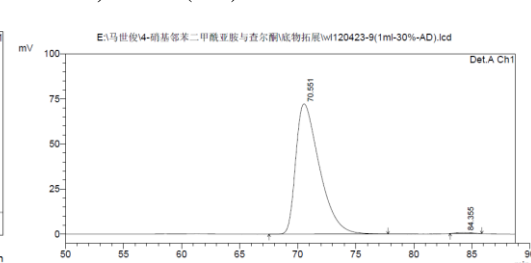

1 Det.A Ch1/254nm

| PeakTable |           |          |        |         |          |
|-----------|-----------|----------|--------|---------|----------|
| Peak#     | Ret. Time | Area     | Height | Area %  | Height % |
| 1         | 70.551    | 10232222 | 72298  | 99.587  | 99.395   |
| 2         | 84.355    | 42423    | 440    | 0.413   | 0.605    |
| Total     |           | 10274644 | 72739  | 100.000 | 100.000  |

**2-(3-(4-chlorophenyl)-3-oxo-1-phenylpropyl)-5-nitroisindoline-1,3-dione (3bi)**

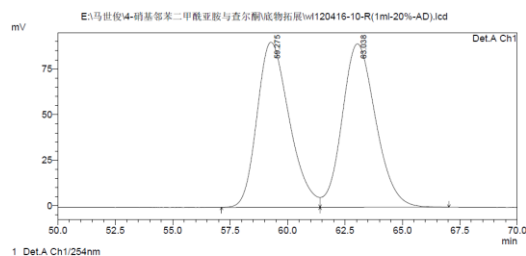

| PeakTable |           |          |        |         |          |
|-----------|-----------|----------|--------|---------|----------|
| Peak#     | Ret. Time | Area     | Height | Area %  | Height % |
| 1         | 59.275    | 8818529  | 90455  | 49.282  | 50.268   |
| 2         | 63.038    | 9075385  | 89491  | 50.718  | 49.732   |
| Total     |           | 17893913 | 179946 | 100.000 | 100.000  |

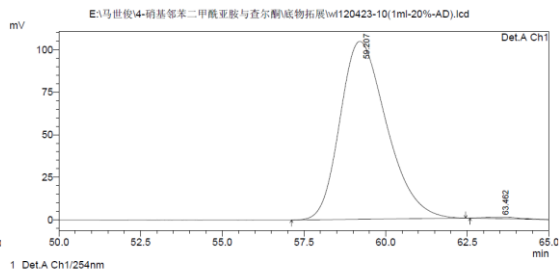

| PeakTable |           |          |        |         |          |
|-----------|-----------|----------|--------|---------|----------|
| Peak#     | Ret. Time | Area     | Height | Area %  | Height % |
| 1         | 59.207    | 10379441 | 104545 | 99.406  | 99.233   |
| 2         | 63.462    | 61993    | 808    | 0.594   | 0.767    |
| Total     |           | 10441434 | 105353 | 100.000 | 100.000  |

### 2-(1,3-bis(4-fluorophenyl)-3-oxopropyl)-5-nitroisindoline-1,3-dione (3bj)

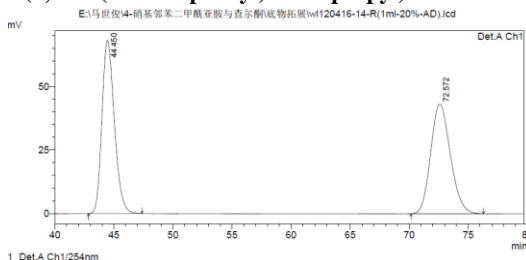

| PeakTable |           |         |        |         |          |
|-----------|-----------|---------|--------|---------|----------|
| Peak#     | Ret. Time | Area    | Height | Area %  | Height % |
| 1         | 44.450    | 4968649 | 68032  | 49.871  | 61.217   |
| 2         | 72.572    | 4994374 | 43100  | 50.129  | 38.783   |
| Total     |           | 9963023 | 111132 | 100.000 | 100.000  |

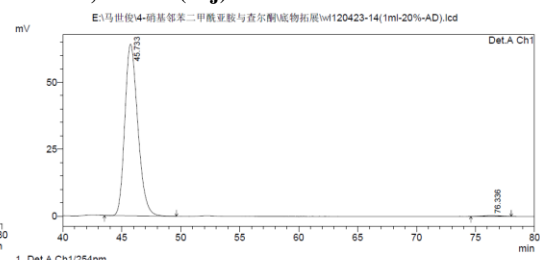

| PeakTable |           |         |        |         |          |
|-----------|-----------|---------|--------|---------|----------|
| Peak#     | Ret. Time | Area    | Height | Area %  | Height % |
| 1         | 45.733    | 4911579 | 64077  | 99.368  | 99.526   |
| 2         | 76.336    | 31243   | 305    | 0.632   | 0.474    |
| Total     |           | 4942822 | 64383  | 100.000 | 100.000  |

### 2-(2-methyl-5-oxohexan-3-yl)-5-nitroisindoline-1,3-dione (3bk)

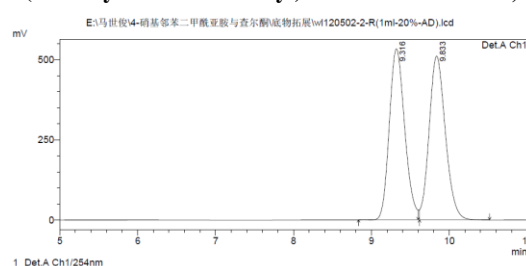

| PeakTable |           |          |         |         |          |
|-----------|-----------|----------|---------|---------|----------|
| Peak#     | Ret. Time | Area     | Height  | Area %  | Height % |
| 1         | 9.316     | 2266166  | 412438  | 49.754  | 51.093   |
| 2         | 9.833     | 7564037  | 509758  | 50.246  | 48.907   |
| Total     |           | 14650173 | 1042295 | 100.000 | 100.000  |

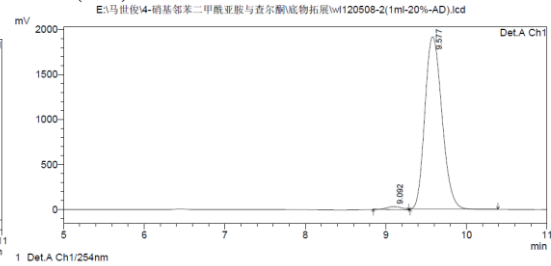

| PeakTable |           |          |         |         |          |
|-----------|-----------|----------|---------|---------|----------|
| Peak#     | Ret. Time | Area     | Height  | Area %  | Height % |
| 1         | 9.092     | 434926   | 33944   | 1.523   | 1.742    |
| 2         | 9.577     | 28119452 | 195120  | 98.477  | 98.255   |
| Total     |           | 28554377 | 1949064 | 100.000 | 100.000  |

### 5-nitro-2-(2-oxoheptan-4-yl)isindoline-1,3-dione (3bl)

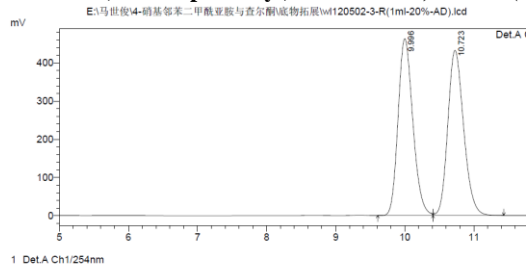

| PeakTable |           |          |        |         |          |
|-----------|-----------|----------|--------|---------|----------|
| Peak#     | Ret. Time | Area     | Height | Area %  | Height % |
| 1         | 9.996     | 6580012  | 463984 | 49.906  | 47.710   |
| 2         | 10.723    | 6875905  | 432112 | 50.094  | 48.281   |
| Total     |           | 13725916 | 895196 | 100.000 | 100.000  |

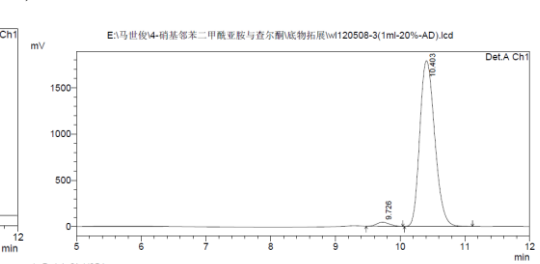

| PeakTable |           |          |         |         |          |
|-----------|-----------|----------|---------|---------|----------|
| Peak#     | Ret. Time | Area     | Height  | Area %  | Height % |
| 1         | 9.726     | 614857   | 45023   | 2.091   | 2.241    |
| 2         | 10.493    | 28766342 | 1791994 | 97.909  | 97.540   |
| Total     |           | 29400999 | 1837016 | 100.000 | 100.000  |

### 5-nitro-2-(2-oxooctan-4-yl)isindoline-1,3-dione (3bm)

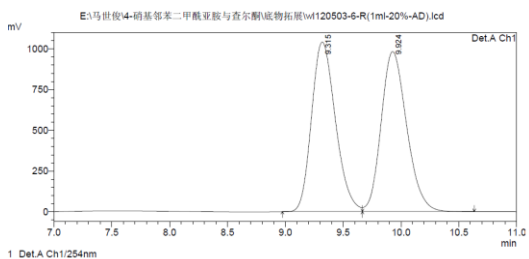

| PeakTable |           |          |         |         |          |
|-----------|-----------|----------|---------|---------|----------|
| Peak#     | Ret. Time | Area     | Height  | Area %  | Height % |
| 1         | 9.315     | 14925441 | 1039963 | 49.803  | 51.449   |
| 2         | 9.824     | 15043525 | 981396  | 50.197  | 48.551   |
| Total     |           | 29968966 | 2021359 | 100.000 | 100.000  |

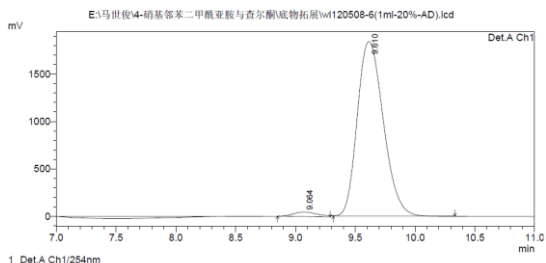

| PeakTable |           |          |         |         |          |
|-----------|-----------|----------|---------|---------|----------|
| Peak#     | Ret. Time | Area     | Height  | Area %  | Height % |
| 1         | 9.064     | 673208   | 47868   | 2.363   | 2.537    |
| 2         | 9.610     | 27822017 | 1839124 | 97.637  | 97.463   |
| Total     |           | 28495226 | 1886993 | 100.000 | 100.000  |

### 5-nitro-2-(2-oxononan-4-yl)isoindoline-1,3-dione (3bn)

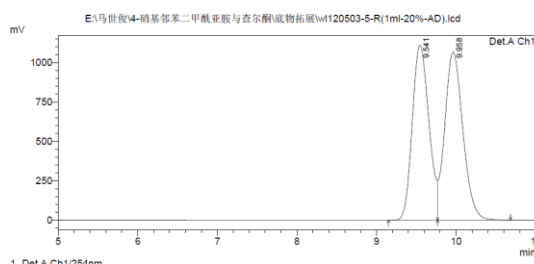

| PeakTable |           |          |         |         |          |
|-----------|-----------|----------|---------|---------|----------|
| Peak#     | Ret. Time | Area     | Height  | Area %  | Height % |
| 1         | 9.541     | 16128316 | 1110383 | 48.802  | 50.950   |
| 2         | 9.858     | 16920369 | 1068740 | 51.198  | 49.044   |
| Total     |           | 33048686 | 2179123 | 100.000 | 100.000  |

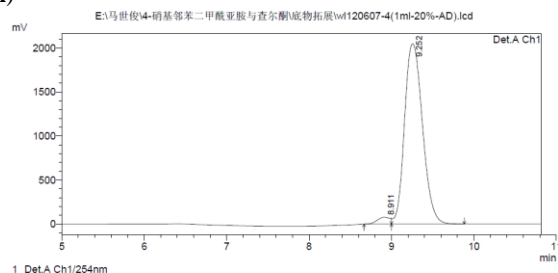

| PeakTable |           |          |         |         |          |
|-----------|-----------|----------|---------|---------|----------|
| Peak#     | Ret. Time | Area     | Height  | Area %  | Height % |
| 1         | 8.911     | 842055   | 79041   | 2.642   | 3.715    |
| 2         | 9.252     | 31031479 | 2048603 | 97.358  | 96.285   |
| Total     |           | 31873535 | 2127644 | 100.000 | 100.000  |

### 5-nitro-2-(2-oxodecan-4-yl)isoindoline-1,3-dione (3bo)

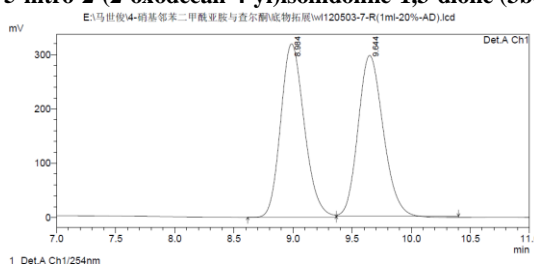

| PeakTable |           |         |        |         |          |
|-----------|-----------|---------|--------|---------|----------|
| Peak#     | Ret. Time | Area    | Height | Area %  | Height % |
| 1         | 9.584     | 4438242 | 319268 | 50.550  | 51.869   |
| 2         | 9.644     | 4341698 | 286254 | 49.450  | 48.131   |
| Total     |           | 8779941 | 615523 | 100.000 | 100.000  |

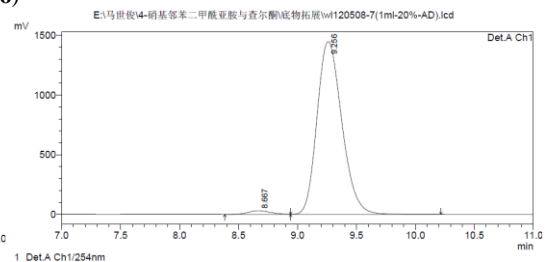

| PeakTable |           |          |         |         |          |
|-----------|-----------|----------|---------|---------|----------|
| Peak#     | Ret. Time | Area     | Height  | Area %  | Height % |
| 1         | 8.667     | 401428   | 39500   | 1.859   | 2.061    |
| 2         | 9.256     | 21198051 | 1449225 | 98.141  | 97.939   |
| Total     |           | 21599479 | 1479726 | 100.000 | 100.000  |

### 5-nitro-2-(4-oxohexan-2-yl)isoindoline-1,3-dione (3bp)

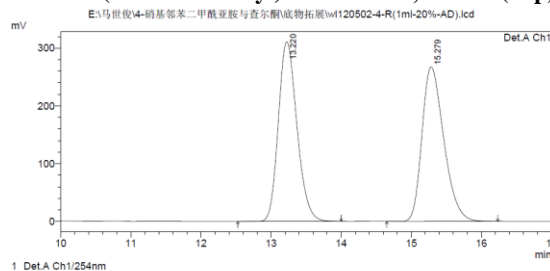

| PeakTable |           |          |        |         |          |
|-----------|-----------|----------|--------|---------|----------|
| Peak#     | Ret. Time | Area     | Height | Area %  | Height % |
| 1         | 13.220    | 5725564  | 311059 | 49.749  | 53.754   |
| 2         | 15.279    | 5783335  | 307597 | 50.251  | 46.245   |
| Total     |           | 11508899 | 578655 | 100.000 | 100.000  |

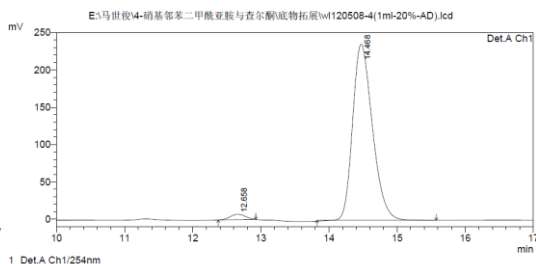

| PeakTable |           |         |        |         |          |
|-----------|-----------|---------|--------|---------|----------|
| Peak#     | Ret. Time | Area    | Height | Area %  | Height % |
| 1         | 12.658    | 134007  | 7247   | 2.341   | 3.019    |
| 2         | 14.468    | 4754993 | 236003 | 97.659  | 96.981   |
| Total     |           | 4869000 | 243350 | 100.000 | 100.000  |
